# Supplementary material
Source: ML conference proceedings conference paper supplement (https://openreview.net/forum?id=VdOaaDzDD6)
Supplement: supplementary_material [file attachment]

# BANDITS WITH RANKING FEEDBACK

**Anonymous authors**

Paper under double-blind review

## ABSTRACT

In this paper, we introduce a novel variation of multi-armed bandits called *bandits with ranking feedback*. Unlike traditional bandits, this variation provides feedback to the learner that allows them to rank the arms based on previous pulls, without quantifying numerically the difference in performance. This type of feedback is well-suited for scenarios where the arms’ values cannot be precisely measured using metrics such as monetary scores, probabilities, or occurrences. Common examples include human preferences in matchmaking problems. Furthermore, its investigation answers the theoretical question on how numerical rewards are crucial in bandit settings. In particular, we study the problem of designing *no-regret* algorithms with ranking feedback both in the *stochastic* and *adversarial* settings. We show that, with stochastic rewards, differently from what happens with non-ranking feedback, no algorithm can suffer a logarithmic regret in the time horizon  $T$  in the instance-dependent case. Furthermore, we provide two algorithms. The first, namely DREE, guarantees a superlogarithmic regret in  $T$  in the instance-dependent case thus matching our lower bound, while the second, namely R-LPE, guarantees a regret of  $\tilde{O}(\sqrt{T})$  in the instance-independent case. Remarkably, we show that no algorithm can have an optimal regret bound in both instance-dependent and instance-independent cases. We also prove that no algorithm can achieve a sublinear regret when the rewards are adversarial. Finally, we numerically evaluate our algorithms in a testbed, and we compare their performance with some baseline from the literature.

## 1 INTRODUCTION

*Multi-armed bandits* are well-known sequential decision-making problems where a learner is given a number of arms whose reward is unknown (Lattimore & Szepesvari, 2017). At every round, the learner can pull an arm and observe a realization of the reward associated with that arm, which can be generated *stochastically* (Auer et al., 2002) or *adversarially* (Auer et al., 1995). The central question in multi-armed bandits concerns how to address the *exploration/exploitation* tradeoff to minimize the *regret* between the reward provided by the *learning policy* and the optimal *clairvoyant* algorithm. Interestingly, multi-armed bandits come with several flavors capturing a wide range of different applications, *e.g.*, with delayed feedback (Vernade et al., 2017; 2020), combinatorial constraints (Combes et al., 2015), and a continuous set of arms (Kleinberg et al., 2019).

In this paper, we introduce a novel variation of multi-armed bandits that, to the best of our knowledge, is unexplored so far. We name the model as *bandits with ranking feedback*. This feedback provides the learner with a partial observation over the rewards given by the arms. More precisely, the learner can rank the arms based on the previous pulls they experienced, but they cannot quantify numerically the difference in performance. Thus, the learner is not allowed to assess how much an arm is better or worse than another. This type of feedback is well-suited for scenarios where the arms’ values cannot be precisely measured using metrics such as monetary scores, probabilities, or occurrences, and naturally applies to various settings, *e.g.*, when dealing with human preferences such as in matchmaking settings among humans and when the scores cannot be revealed for privacy or security reasons. This latter case can be found, *e.g.*, in online advertising platforms offering automatic bidding services as they have no information on the actual revenue of the advertising campaigns since the advertisers prefer not to reveal these values being sensible data for the companies.<sup>1</sup> Remarkably, our

<sup>1</sup>Notice that a platform can observe the number of clicks received by an advertising campaign, but it cannot observe the revenue associated with that campaign.

model poses the interesting theoretical question whether the lack of numerical scores precludes the design of sublinear regret algorithms or worsens the regret bounds that are achievable when numerical scores are available.

**Related Works.** The field most related to bandits with ranking is *preference learning*, which aims at learning the preferences of one or more agents from some observations (Fürnkranz & Hüllermeier, 2010). Let us remark that preference learning has recently gained a lot of attention from the scientific community, as it enables the design of AI artifacts capable of interacting with human-in-the-loop (HTL) environments. Indeed, human feedback may be quite misleading when it is asked to report numerical values, while humans are far more effective at reporting ranking preferences. The preference learning literature mainly focuses on two kinds of preference observations: pairwise preferences and ranking. In the first case, the data observed by the learner involves preferences between two objects, *i.e.*, a partial preference is given to the learner. In the latter, a complete ranking of the available data is given as feedback. Our work belongs to the latter branch. Preference learning has been widely investigated by the online learning community, see, *e.g.*, (Bengs et al., 2018).

Precisely, our work presents several similarities with the *dueling bandits* settings (Yue et al., 2012; Saha & Gaillard, 2022; Lekang & Lamperski, 2019), where, in each round, the learner pulls two arms and observes a ranking over them. Nevertheless, although dueling bandits share similarities to our setting, they present substantial differences. Specifically, in our model, the learner observes a ranking depending on the arms they have pulled so far. In dueling bandits, the learner observes an instantaneous comparison between the arms they have just pulled; thus, the outcome of such a comparison does not depend on the arms previously selected, as is the case of bandits with ranking feedback. As a consequence, while in bandits with ranking feedback the goal of the learner is to exploit the arm with the highest mean, in dueling bandits the goal of the learner is to select the arm winning with the highest probability. Furthermore, while we adopt the classical notion of regret used in the bandit literature to assess the theoretical properties of our algorithms, in dueling bandits, the algorithms are often evaluated with a suitable notion of regret, which differs from the classical one.

Dueling bandits have their reinforcement learning (RL) counterpart in the *preference-based reinforcement learning* (PbRL), see, *e.g.*, (Novoseller et al., 2019) and (Wirth et al., 2017). Interestingly, PbRL techniques differ from the standard RL approaches in that they allow an algorithm to learn from non-numerical rewards; this is particularly useful when the environment encompasses human-like entities (Chen et al., 2022). Furthermore, PbRL provides a bundle of results, ranging from theory (Xu et al., 2020) to practice (Christiano et al., 2017; Lee et al., 2021). In PbRL, preferences may concern both states and actions; contrariwise, our framework is stateless since the rewards gained depend only on the action taken during the learning dynamic. Moreover, the differences outlined between dueling bandits and bandits with ranking feedback still hold for preference-based reinforcement learning, as preferences are considered between observations instead of the empirical mean of the accumulated rewards.

**Original Contributions.** We investigate the problem of designing *no-regret* algorithms for bandits with ranking in both *stochastic* and *adversarial* settings. With stochastic rewards, we show that ranking feedback does not preclude sublinear regret. However, it worsens the upper bounds achievable by the algorithms. In particular, in the instance-dependent case, we show that no algorithm can suffer from a logarithmic regret in the time horizon (as instead is possible in the non-ranking case), and we provide an algorithm, namely DREE (Dynamical Ranking Exploration-Exploitation), guaranteeing superlogarithmic regret that matches the lower bound. In the instance-independent case, a crucial question is whether there is an algorithm providing a regret bound better than the well-known Explore-then-Commit algorithm which trivially guarantees a regret of  $\tilde{O}(T^{2/3})$  in our case. We design an algorithm, namely R-LPE (Ranking Logarithmic Phased Elimination), which guarantees a regret of  $\tilde{O}(\sqrt{T})$  in the instance-independent case. More importantly, we show that no algorithm can have an optimal regret bound in both instance-dependent and instance-independent cases. Furthermore, with adversarial rewards, we show that ranking feedback precludes sublinear regret, and therefore numerical rewards are strictly necessary in adversarial online learning settings. Finally, we numerically evaluate our DREE and R-LPE algorithms in a testbed, and we compare their performance with some baseline from the literature in different settings. We show that our algorithms dramatically outperform the baselines in terms of empirical regret.

## 2 PROBLEM FORMULATION

In this section, we formally state the model of bandits with ranking feedback and discuss the learner-environment interaction. Subsequently, we define policies and the regret notion both in the *stochastic* and in the *adversarial* settings.

**Setting and Interaction.** Differently from standard bandits—see, *e.g.*, the work by (Lattimore & Szepesvari, 2017)—in which the learner observes the *reward* associated with the pulled arm, in bandits with ranking feedback the learner can only observe a *ranking* over the arms based on the previous pulls. Formally, we assume the learner-environment interaction to unfold as follows.<sup>2</sup>

- (i) At every round  $t \in [T]$ , where  $T$  is the time horizon, the learner chooses an arm  $i_t \in \mathcal{A} := [n]$ , where  $\mathcal{A}$  is the set of available arms and  $n = |\mathcal{A}| < +\infty$ .
- (ii) We study both stochastic and adversarial rewards. In the stochastic setting, the environment draws the reward  $r_t(i_t)$  associated with arm  $i_t$  from a probability distribution  $\nu_{i_t}$ , *i.e.*,  $r_t(i_t) \sim \nu_{i_t}$ , whereas, in the adversarial setting,  $r_t(i_t)$  is chosen adversarially by an opponent from a bounded set of reward functions.
- (iii) There is a bandit feedback on the reward of the arm  $i_t \in \mathcal{A}$  pulled at round  $t$  leading to the estimate of the empirical mean of  $i_t$  as follows:

$$\hat{r}_t(i) := \frac{\sum_{j \in \mathcal{W}_t(i)} r_j(i)}{Z_i(t)},$$

where  $\mathcal{W}_t(i) := \{\tau \in [t] \mid i_\tau = i\}$  and  $Z_i(t) := |\mathcal{W}_t(i)|$ .<sup>3</sup> However, the learner observes the rank over the empirical means  $\{\hat{r}_t(i)\}_{i \in \mathcal{A}}$ . We denote with  $\mathcal{S}_{\mathcal{A}}$  the set containing all the possible permutations of the elements of set  $\mathcal{A}$ . Formally, we assume that the ranking  $\mathcal{R}_t \in \mathcal{S}_{\mathcal{A}}$  observed by the learner at round  $t$  is such that:

$$\hat{r}_t(\mathcal{R}_{t,i}) \geq \hat{r}_t(\mathcal{R}_{t,j}) \quad \forall t \in [T] \quad \forall i, j \in [n] \text{ s.t. } i \geq j,$$

where  $\mathcal{R}_{t,i} \in \mathcal{A}$  denotes the  $i$ -th element in the ranking  $\mathcal{R}_t$  at round  $t \in [T]$ .

For the sake of clarity, we provide an example to illustrate bandits with ranking feedback and the corresponding learner-environment interaction.

**Example.** We consider an environment with two arms, *i.e.*,  $\mathcal{A} = \{1, 2\}$ , in which the learner plays the first action at rounds  $t = 1$  and  $t = 3$  and the second action at round  $t = 2$ , so that  $\mathcal{W}_3(1) = \{1, 3\}$  and  $\mathcal{W}_3(2) = \{2\}$ . Let  $r_1(1) = 1$  and  $r_3(1) = 5$  be the rewards when playing the first arm at rounds  $t = 1$  and  $t = 3$ , respectively, while let  $r_2(2) = 5$  be the reward when playing the second arm at round  $t = 2$ . The empirical means of the two arms and resulting rankings at every round  $t \in [3]$  are given by:

$$\begin{cases} \hat{r}_t(1) = 1, \hat{r}_t(2) = 0 & \mathcal{R}_t = \langle 1, 2 \rangle & t = 1 \\ \hat{r}_t(1) = 1, \hat{r}_t(2) = 5 & \mathcal{R}_t = \langle 2, 1 \rangle & t = 2 \\ \hat{r}_t(1) = 3, \hat{r}_t(2) = 5 & \mathcal{R}_t = \langle 2, 1 \rangle & t = 3 \end{cases}$$

**Policies and Regret.** At every round  $t$ , the action played by the learner is prescribed by a policy  $\pi$ . In both the stochastic and adversarial settings, we let the policy  $\pi$  be a randomized map from the history of the interaction  $H_{t-1} = (\mathcal{R}_1, i_1, \mathcal{R}_2, i_2, \dots, \mathcal{R}_{t-1}, i_{t-1})$  to the set of all the probability distributions with support  $\mathcal{A}$ . Formally, we let  $\pi : H_{t-1} \rightarrow \Delta(\mathcal{A})$ , for  $t \in [T]$ , such that  $i_t \sim \pi(H_{t-1})$ . As it is customary in bandits, the learner's goal is to design a policy  $\pi$  minimizing the cumulative expected regret, whose formal definition is as follows:

$$R_T(\pi) = \mathbb{E} \left[ \sum_{t=1}^T r_t(i^*) - r_t(i_t) \right],$$

<sup>2</sup>Given  $n \in \mathbb{N}_{>0}$  we denote with  $[n] := \{1, \dots, n\}$ .

<sup>3</sup>Note that the latter definition is well-posed as long as  $|\mathcal{W}_t(i)| > 0$ . For each  $i \in \mathcal{A}$  and  $t \in [T]$  such that  $|\mathcal{W}_t(i)| = 0$ , we let  $\hat{r}_t(i) = 0$ .

where the expectation is over the randomness of both the policy and environment in the stochastic setting, and we let  $i^* \in \arg \max_{i \in \mathcal{A}} \mu_i$  with  $\mu_i = \mathbb{E}[\nu_i]$ , whereas the expectation is over the randomness of the policy in the adversarial setting and we let  $i^* \in \arg \max_{i \in \mathcal{A}} \sum_{t=1}^T r_t(i)$ . For the sake of simplicity, from here on, we omit the dependence on  $\pi$ , referring to  $R_T(\pi)$  as  $R_T$ . The impossibility of observing the reward realizations raises several technical difficulties when designing no-regret algorithms since the approaches adopted for standard (non-ranking) bandits do not generalize to our case. In the following sections, we discuss how the lack of this information degrades the performance of the algorithms when the feedback is ranking.

### 3 ANALYSIS IN THE STOCHASTIC SETTING

Initially, we observe that approaches based on *optimism-vs.-uncertainty*, such as UCB1, might be challenging to apply within our framework. This is because the learner lacks the information to estimate the reward associated with an arm, making it difficult to infer a confidence bound. Therefore, the most popular class of algorithms one can employ in bandits with ranking feedback is that of *explore-then-commit* (EC) algorithms, where the learner either exploits a single arm or explores the others according to a deterministic or randomized exploration strategy.

In the following, we distinguish the instance-dependent case from the instance-independent one. In particular, we provide two algorithms, each guaranteeing a sublinear regret in one of the two cases.

#### 3.1 INSTANCE-DEPENDENT LOWER BOUND

It is well-known that standard bandits admit algorithms guaranteeing a regret that is logarithmic in time horizon  $T$  in the instance-dependent case. We show in this section that such a result does not hold when the feedback is provided as a ranking. More precisely, our result rules out the possibility of having a logarithmic regret. However, in the next section, we prove that we can get a regret whose dependence on  $T$  is arbitrarily close to a logarithm, thus showing that the extra cost one has to pay in the instance-dependent case to deal with ranking feedback is asymptotically negligible in  $T$ .

Our impossibility result exploits a connection between random walks and arms' cumulative rewards. Formally, we define an (asymmetric) random walk as follows.

**Definition 1.** A random walk is a stochastic process  $\{G_t\}_{t \in \mathbb{N}}$  such that:

$$G_t = \begin{cases} 0 & t = 1 \\ G_{t-1} + \epsilon_t & t > 1 \end{cases},$$

where  $\{\epsilon_t\}_{t \in \mathbb{N}}$  is an i.i.d. sequence of random variables, and  $\mathbb{E}[\epsilon_t]$  is the drift of the random walk.

We model the cumulative reward collected by a specific arm during the learning process as a random walk, where the drift represents the expected reward associated with that arm. Let us notice that, in bandits where the feedback is not given as a ranking, the learner can completely observe the evolution of the random walks, being able to observe the realizations of the reward associated with each pulled arm. Such observations allow the learner to estimate the difference between the performance of each pair of arms. For instance, the learner can observe whether two arms perform similarly or, instead, whether the gap between their performances is significant. Differently, in our case, the learner only observes the rank without quantify numerically the performance.

This loss of information raises several technical issues that are crucial, especially when the random walks never switch. Intuitively, in bandits with ranking feedback, we can observe how close the expected rewards of two arms are only by observing subsequent switches of their positions in the ranking. However, there is a strictly positive probability that two random walks never switch (thus leading to no intersection) when they have a different drift  $\mathbb{E}[\epsilon_t]$  and therefore we may not evaluate how two arms are close. This is shown in the following lemma.

**Lemma 1** (Separation lemma). Let  $G_t, G'_t$  be two independent random walks defined as:

$$G_{t+1} = G_t + \epsilon_t \quad \text{and} \quad G'_{t+1} = G'_t + \epsilon'_t,$$

where  $G_0 = G'_0 = 0$  and the drifts satisfy  $\mathbb{E}[\epsilon_t] = p > q = \mathbb{E}[\epsilon'_t]$ . Then:

$$\mathbb{P}\left(\forall t, t' \in \mathbb{N}^* \quad G_t/t \geq G'_{t'}/t'\right) > 0.$$

The rationale of the above lemma is that, given two random walks with different drifts, there is a line separating them with a strictly positive probability. Therefore, with a non-negligible probability, the empirical mean corresponding to the process with the higher drift upper bounds forever the empirical mean of the process with the lower drift. In bandits with ranking feedback, such a separation lemma shows that the problem of distinguishing two different instances is harder than in the standard, non-ranking feedback case. Before stating our result, as is customary in bandit literature, let us denote with  $\Delta_i := \mu_i^* - \mu_i$ , where we let  $i^* \in \arg \max_{i \in \mathcal{A}} \mu_i$  and  $\mu_i := \mathbb{E}[\nu_i]$ . Now, we can state the following result for the instance-dependent case.

**Theorem 1** (Instance-dependent lower bound). *Let  $\pi$  be any policy for the bandits with ranking feedback, then, for any  $C(\cdot) : [0, +\infty) \rightarrow [0, +\infty)$ , there is  $\{\Delta_i\}_{i \in [n]}$  and a time horizon  $T > 0$  such that  $R_T > \sum_{i=1}^n C(\Delta_i) \log(T)$ .*

*Proof sketch.* It is well-known in the bandit literature that, to achieve logarithmic regret, it is necessary to pull any suboptimal arm at least  $\sim \frac{\log(T)}{\Delta_i^2}$  times. The values of  $\Delta_i$  cannot be estimated without a switch in the ranking. Since even when  $\Delta_i$ s are very small, the optimal arm may remain in the first position for the whole process,  $\Delta_i$  cannot be estimated, and it is necessary to pull the suboptimal arms more than  $\mathcal{O}(\log(T))$  times.  $\square$

### 3.2 INSTANCE-DEPENDENT UPPER BOUND

We introduce the Dynamical Ranking Exploration-Exploitation algorithm (DREE). The pseudo-code is provided in Algorithm 1. As usual in bandit algorithms, in the first  $n$  rounds, a pull for each arm is performed (Lines 2–4). At every subsequent round  $t > n$ , the exploitation/exploration tradeoff is addressed by playing the best arm according to the received feedback unless there is at least one arm whose number of pulls at  $t$  is smaller than a superlogarithmic function  $f(t) : (0, \infty) \rightarrow \mathbb{R}_+$ .<sup>4</sup> More precisely, the algorithm plays an arm  $i$  at round  $t$  if it has been pulled less than  $f(t)$  times (Lines 5–6), where ties due to multiple arms pulled less than  $f(t)$  times are broken arbitrarily. Instead, if all arms have been pulled at least  $f(t)$  times, the arm in the highest position of the last ranking feedback is pulled (Lines 7–9). Each round ends once the learner receives the feedback in terms of ranking over the arms (Line 10). Let us observe that the exploration strategy of Algorithm 1 is deterministic, and the only source of randomness concerns the realization of the arms' rewards.

---

#### Algorithm 1 Dynamical Ranking Exploration-Exploitation (DREE)

---

```

1: for  $t \in [T]$  do
2:   if  $t \leq n$  then
3:     play arm  $i_t$ 
4:   end if
5:   if There is an arm  $i$  played less than  $f(t)$  times then
6:     Play  $i_t = i$ 
7:   else
8:     Play  $i_t = \mathcal{R}_{t-1,1}$ 
9:   end if
10:  Receive updated ranking  $\mathcal{R}_t$ 
11: end for

```

---

We state the following result, providing the upper regret bound of Algorithm 1 as a function of  $f$ .

**Theorem 2** (Instance-dependent upper bound). *Assume that the reward distribution of every arm is 1-subgaussian. Let  $f : (0, \infty) \rightarrow \mathbb{R}$  be a superlogarithmic function in  $t$ , then there is a term  $C(f, \Delta_i)$  for each sub-optimal arm  $i \in [n]$  which does not depend on  $T$ , such that Algorithm 1 satisfies:*

$$R_T \leq f(T) \sum_{i=1}^n \Delta_i + \log(T) \sum_{i=1}^n C(f, \Delta_i).$$

---

<sup>4</sup>A function  $f(t)$  is superlogarithmic when  $\lim_{t \rightarrow \infty} \frac{f(t)}{\log(t)} = +\infty$ .

To minimize the asymptotic dependence in  $T$  of the cumulative regret suffered by the algorithm, we can choose, e.g.,  $f : (0, \infty) \rightarrow \mathbb{R}$  as  $f(t) = \log(t)^{1+\delta}$ , where parameter  $\delta > 0$  is as small as possible. However, the minimization of  $\delta$  comes at the cost of increasing the terms  $C(f, \Delta_i)$  as they grow exponentially as  $\delta > 0$  goes to zero as long as  $\Delta_i < 1$ . In particular, the terms  $C(f, \Delta_i)$  are defined as stated in the following corollary.

**Corollary 3.** *Let  $\delta > 0$  and  $f(t) = \log(t)^{1+\delta}$  be the sperlogarithmic function used in Algorithm 1, then we have:*

$$C(f, \Delta_i) = \frac{2\Delta_i \left( e^{((2/\Delta_i^2)^{1/\delta})} + 1 \right)}{1 - e^{-\Delta_i^2/2}}$$

We remark that the term  $C(f, \Delta_i)$  depends exponentially on  $\Delta_i$ , suggesting that  $C(f, \Delta_i)$  may be large even when adopting values of  $\delta$  that are not arbitrarily close to zero.

Furthermore, let us observe that Algorithm 1 satisfies important properties in the instance-dependent stochastic setting. More precisely, (i) it matches the instance-dependent regret lower-bound, since  $f(\cdot)$  can be chosen arbitrarily close to  $\log(t)$ , (ii) it works without requiring the knowledge of the time horizon  $T$ , thus being an *any-time algorithm*.

### 3.3 INSTANCE DEPENDENT/INDEPENDENT TRADE-OFF

In this section, we provide a negative result, showing that *no algorithm* can perform well in both the instance-dependent and instance-independent cases, thus suggesting that the two cases need to be studied separately. Initially, we state the following result that relates to the upper regret bounds in the two (instance-dependent/independent) cases.

**Theorem 4** (Instance Dependent/Independent Trade-off). *Let  $\pi$  be any policy for the bandits with ranking feedback problem. If  $\pi$  satisfies the following properties:*

- (instance-dependent upper regret bound)  $R_T \leq \sum_{i=1}^n C(\Delta_i) T^\alpha$
- (instance-independent upper regret bound)  $R_T \leq nCT^\beta$

*then,  $2\alpha + \beta \geq 1$ , where  $\alpha, \beta \geq 0$ .*

From Theorem 4, we can easily infer the following impossibility result.

**Corollary 5.** *There is no algorithm for bandits with ranking feedback achieving both subpolynomial regret in the instance-dependent case, i.e.,  $\forall \alpha > 0, \exists C(\cdot) : R_T \leq \sum_{i=1}^n C(\Delta_i) T^\alpha$ , and sublinear regret in the instance-independent case.*

To ease the interpretation of Corollary 5, we discuss the performance of Algorithm 1 in the instance-independent case in the following result.

**Corollary 6.** *For every choice of  $\delta > 0$  in  $f(t) = \log(t)^{1+\delta}$ , there is no value of  $\eta > 0$  for which Algorithm 1 achieves an instance-independent regret bound of the form  $R_T \leq \mathcal{O}(T^{1-\eta})$ .*

The above result shows that Algorithm 1 suffers from linear regret in  $T$  in the instance-independent case except for logarithmic terms.

### 3.4 INSTANCE-INDEPENDENT UPPER BOUND

The impossibility result stated by Corollary 5 pushes for the need for an algorithm guaranteeing a sublinear regret in the instance-independent case. Initially, we observe that the standard Explore-then-Commit algorithm (from here on denoted with EC) proposed by Lattimore & Szepesvari (2017) can be applied, achieving a regret bound  $\mathcal{O}(T^{2/3})$  in the instance-independent case.

Let us briefly summarize the functioning of the EC algorithm. It divides the time horizon into two phases as follows: (i) *exploration phase*: the arms are pulled uniformly for the first  $m \cdot n$  rounds, where  $m$  is a parameter of the algorithm one can tune to minimize the regret; (ii) *commitment phase*: the arm maximizing the estimated reward is pulled.

In the case of bandits with ranking feedback, the EC algorithm explores the arms in the first  $m \cdot n$  rounds and subsequently pulls the arm in the first position of the ranking feedback received at round  $t = m \cdot n$ . As is customary in standard (non-ranking) bandits, the best regret bound can be achieved by setting  $m = \lceil T^{2/3} \rceil$ , thus obtaining  $\mathcal{O}(T^{2/3})$ .

We show that we can get a regret bound better than that of the EC algorithm. In particular, we provide the Ranking Logarithmic Phased Elimination (R-PLE) algorithm, which breaks the barrier of  $\mathcal{O}(T^{2/3})$  guaranteeing a regret  $\tilde{\mathcal{O}}(\sqrt{T})$  when neglecting logarithmic terms. The pseudocode of R-PLE is reported in Algorithm 2.

**R-LPE Algorithm.** In order to properly analyze the algorithm, we need to introduce the two following definitions. Initially, we introduce the definition of the loggrid set as follows,

**Definition 2** (Loggrid). *Given two real numbers  $a, b$  s.t.  $a < b$  and a constant value  $T$ , we define*

$$LG(a, b, T) := \left\{ \lfloor T^{\lambda_j b + (1-\lambda_j)a} \rfloor : \lambda_j = \frac{j}{\lfloor \log(T) \rfloor}, \forall j = 0, \dots, \lfloor \log(T) \rfloor \right\}.$$

Next, we give the notion of active set, which the algorithm employs to cancel out sub-optimal arms.

**Definition 3** (Active set). *We define the active set  $\mathcal{F}_t(\zeta)$  at the timestep  $t$  of the algorithm, the set of arms*

$$\mathcal{F}_t(\zeta) := \left\{ a \in A : \forall b \in A \quad \sum_{\tau=1:n|\tau}^t \{\mathcal{R}_\tau(a) > \mathcal{R}_\tau(b)\} \geq \zeta \right\}.$$

Where the symbol  $|$  stands for "divide", so that the condition  $\tau|n$  means that we are summing only over the  $\tau$  which are multiple of  $n$ . This condition will be called **filtering condition**.

---

**Algorithm 2** Ranking Logarithmic Phased Elimination (R-LPE)

---

```

1: Initialize  $S = [n]$ 
2: Initialize  $\mathcal{L} = LG(1/2, 1, T)$ 
3: for  $t \in [T]$  do
4:   Play  $i_t \in \arg \min_{i \in S} Z_i(t)$ 
5:   Update  $Z_i(t)$  number of times  $i_t$  has been pulled
6:   Observe ranking  $\mathcal{R}_t$ 
7:   if  $\min_{i \in S} Z_i(t) \in \mathcal{L}$  then
8:      $\alpha = \frac{\log(\min_{i \in S} Z_i(t))}{\log(T)} - \frac{1}{2}$ 
9:      $S = \mathcal{F}_t(T^{2\alpha})$ 
10:  end if
11: end for
```

---

Initially, we observe that R-LPE differs from Algorithm 1, as it takes into account the whole history of the process and not only the last ranking  $\mathcal{R}_t$  received. It also requires the knowledge of  $T$ .

Set  $S$  denotes the active set of arms used by the algorithm. Initially, set  $S$  comprises all the possible arms available in the problem (Line 1). Furthermore, the set which drives the update of the decision space  $S$ , namely  $\mathcal{L}$ , is initialized as the loggrid built on parameters  $1/2, 1, T$  (Line 2).

At every round  $t \in [T]$ , R-LPE chooses the arm from active set  $S$  with the minimum number of pulls, namely  $i$  s.t.  $Z_i(t)$  is minimized (Line 4); ties are broken by index order. Next, the number of times arm  $i_t$  has been pulled, namely  $Z_{i_t}(t)$ , is updated accordingly (Line 5). The peculiarity of the algorithm is that set  $S$  changes every time the condition  $\min_i Z_i(t) \in \mathcal{L}$  is satisfied (Line 7). When the aforementioned condition is met, the set of active arms  $S$  is filtered to avoid the exploration on sub-optimal arms. Precisely,  $S$  is filtered given the time dependent parameter  $\alpha$  (Line 8-9).

**Regret Bound.** We state the following theorem providing a regret bound to Algorithm 2 in the instance-independent case.

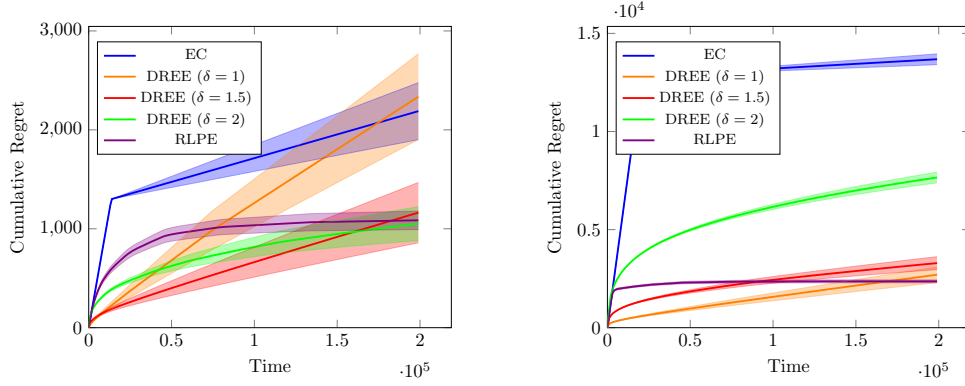

(a) Instance with  $\Delta_{\min} = 0.03$  and all the gaps small (b) Instance with  $\Delta_{\min} = 0.03$  and the other gaps big

Figure 1: Cumulative regret for  $\Delta_{\min} < 0.05$  (averaged over 50 runs; 95% confidence interval).

**Theorem 7.** *In the stochastic bandits with ranking feedback setting, Algorithm 2 achieves the following regret bound:*

$$R_T \leq \tilde{\mathcal{O}}\left(n\sqrt{T}\right),$$

when  $n$  arms are available to the learner.

At first glance, the result presented in Theorem 7 may seem unsurprising. Indeed, there are several elimination algorithms achieving  $\mathcal{O}(\sqrt{T})$  regret bounds in different bandit settings (see, for example, (Auer & Ortner, 2010; Lattimore et al., 2020; Li & Scarlett, 2022)). Nevertheless, our setting poses several additional challenges compared to existing ones. For instance, in our framework, it is not possible to rely on concentration bounds, as the current feedback is heavily correlated with the past ones. For such a reason, our analysis employs non-trivial arguments, drawing from recent results in the theory of Brownian Motions, which allow to properly model the particular feedback we propose.

## 4 ANALYSIS IN THE ADVERSARIAL SETTING

We focus on bandits with ranking feedback in adversarial settings. In particular, we show that no algorithm provides sublinear regret without statistical assumptions on the rewards.

**Theorem 8.** *In adversarial bandits with ranking feedback, no algorithm achieves  $o(T)$  regret with respect to the best arm in hindsight with a probability of  $1 - \epsilon$  for any  $\epsilon > 0$ .*

*Proof sketch.* The proof introduces three instances in an adversarial setting in a way that no algorithm can achieve sublinear regret in all the three. The main reason behind such a negative result is that ranking feedback obfuscates the value of the rewards so as not to allow the algorithm to distinguish two or more instances where the rewards are non-stationary. The three instances employed in the proof are divided into three phases such that the instances are similar in terms of rewards for the first two phases, while they are extremely different in the third phase. In summary, if the learner receives the same ranking when playing in two instances with different best arms in hindsight, it is not possible to achieve a small regret in both of them.  $\square$

## 5 NUMERICAL EVALUATION

This section presents a numerical evaluation of the algorithms proposed in the paper for the *stochastic settings*, namely, DREE and R-LPE. The goal of such a study is to show two crucial results: firstly, the comparison of our algorithms with a well-known bandit baseline, and secondly, the need to develop distinct algorithms tailored for instance-dependent and instance-independent scenarios.



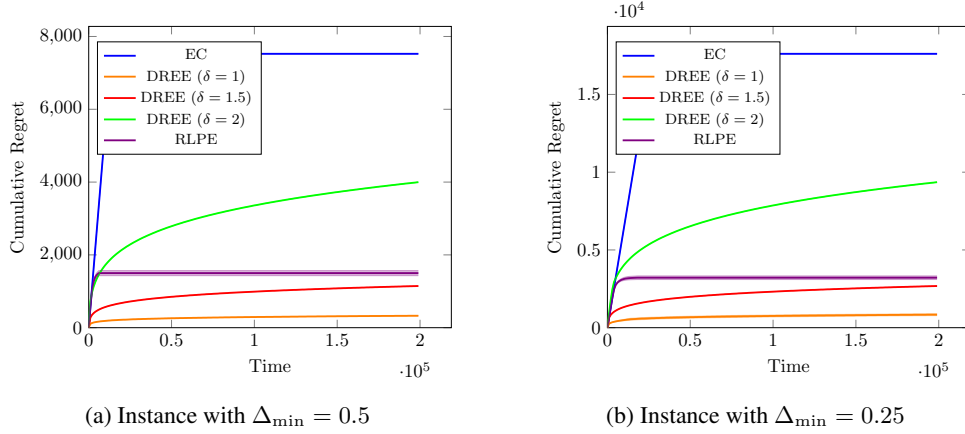

Figure 2: Cumulative regret for  $\Delta_{\min} \geq 0.25$  (averaged over 50 runs; 95% confidence interval).

To establish a benchmark for comparison, we consider the EC (Explore-Then-Commit) algorithm, which is one of the most popular algorithms among the explore-then-commit class providing sub-linear regret guarantees. In the following, we evaluate the DREE algorithm with different choices of the  $\delta$  parameter in the function  $f(t) = \log(t)^{1+\delta}$ ; precisely, we choose  $\delta \in \{1.0, 1.5, 2.0\}$ . Furthermore, we consider four stochastic instances whose specific parameters are discussed below. In all these instances, we assume the rewards to be drawn from Gaussian random variables with unit variance, *i.e.*,  $\sigma^2 = 1$ , and we let the time horizon be equal to  $T = 2 \cdot 10^5$ . Finally, for each algorithm, we evaluate the cumulative regret averaged over 50 runs.

We structure the presentation of the experimental results into two groups. In the first, the instances have a small  $\Delta_{\min}$ , while in the second, the instances have a large  $\Delta_{\min}$ .

**Small Values of  $\Delta_{\min}$**  We focus on two instances with  $\Delta_{\min} < 0.05$ . In the first of these two instances, we consider  $n = 4$  arms, and a minimum gap of  $\Delta_{\min} = 0.03$ . In the second instance, we consider  $n = 6$  arms, with  $\Delta_{\min} = 0.03$ . The expected values of the rewards of each arm are reported in Appendix D, while the experimental results in terms of average cumulative regret are reported in Figures 1a–1b. We observe that in the first instance (see Figure 1a) all the DREE algorithms exhibits a linear regret bound, confirming the strong sensitivity of this family of algorithms on the parameter  $\Delta_{\min}$  in terms of regret bound. In contrast, the R-LPE algorithm exhibits better performances in terms of regret bound, as its theoretical guarantee are independent on the values of  $\Delta_{\min}$ . Furthermore, Figure 1b shows that the DREE algorithms (with  $\delta \in \{1.0, 1.5\}$ ) achieve a better regret bound when the number of arms is increased. Indeed, these regret bounds are comparable to the ones achieved by the R-LPE algorithm. The previous result is reasonable as the presence of  $\Delta_i$ -s in the regret bound lowers the dependence on the number of arms. It is worth noticing that all our algorithms outperform the baseline EC.

**Large Values of  $\Delta_{\min}$**  We focus on two instances with  $\Delta_{\min} \geq 0.25$ . In the first instance, we consider  $n = 4$  arms with a minimum gap of  $\Delta_{\min} = 0.5$  among their expected rewards. In the second instance, we instead consider a larger number of arms, specifically  $n = 8$ , with a minimum gap equal to  $\Delta_{\min} = 0.25$ . The expected values of the rewards are reported in Appendix D, while the experimental results in terms of average cumulative regret are provided in Figures 2a–2b. As it clear from both Figures 2a–2b when  $\Delta_{\min}$  is sufficiently large, the DREE algorithms (with  $\delta \in \{1.0, 1.5\}$ ) achieves better performances with respect both the EC and R-PLP algorithms in terms of cumulative regret. Furthermore, there is empirical evidence that a small  $\delta$  guarantees better performance, which is reasonable according to theory. Indeed, when  $\delta$  is small, the function  $f(t)$ , which drives the exploration, is closer to a logarithm. Also, as shown in Corollary 3, when  $\Delta_{\min}$  is large enough, the parameter  $\delta$  affects the dimension of  $C(f, \Delta_i)$  more weakly, which results in a better regret bound.

## REFERENCES

- P. Auer, N. Cesa-Bianchi, Y. Freund, and R.E. Schapire. Gambling in a rigged casino: The adversarial multi-armed bandit problem. In *Proceedings of IEEE 36th Annual Foundations of Computer Science*, pp. 322–331, 1995. doi: 10.1109/SFCS.1995.492488.
- Peter Auer and Ronald Ortner. Ucb revisited: Improved regret bounds for the stochastic multi-armed bandit problem. *Periodica Mathematica Hungarica*, 61(1-2):55–65, 2010.
- Peter Auer, Nicolo Cesa-Bianchi, and Paul Fischer. Finite-time analysis of the multiarmed bandit problem. *Machine learning*, 47(2):235–256, 2002.
- Paolo Baldi. Stochastic calculus. In *Stochastic Calculus*, pp. 215–254. Springer, 2017.
- Viktor Bengs, Robert Busa-Fekete, Adil El Mesaoudi-Paul, and Eyke Hüllermeier. Preference-based online learning with dueling bandits: A survey. 2018. doi: 10.48550/ARXIV.1807.11398. URL <https://arxiv.org/abs/1807.11398>.
- Xiaoyu Chen, Han Zhong, Zhuoran Yang, Zhaoran Wang, and Liwei Wang. Human-in-the-loop: Provably efficient preference-based reinforcement learning with general function approximation. In Kamalika Chaudhuri, Stefanie Jegelka, Le Song, Csaba Szepesvari, Gang Niu, and Sivan Sabato (eds.), *Proceedings of the 39th International Conference on Machine Learning*, volume 162 of *Proceedings of Machine Learning Research*, pp. 3773–3793. PMLR, 17–23 Jul 2022. URL <https://proceedings.mlr.press/v162/chen22ag.html>.
- Paul Christiano, Jan Leike, Tom B. Brown, Miljan Martic, Shane Legg, and Dario Amodei. Deep reinforcement learning from human preferences, 2017. URL <https://arxiv.org/abs/1706.03741>.
- Richard Combes, M. Sadegh Talebi, Alexandre Proutiere, and Marc Lelarge. Combinatorial bandits revisited, 2015. URL <https://arxiv.org/abs/1502.03475>.
- Johannes Fürnkranz and Eyke Hüllermeier (eds.). *Preference Learning*. Springer, 2010. ISBN 978-3-642-14124-9. doi: 10.1007/978-3-642-14125-6. URL <https://doi.org/10.1007/978-3-642-14125-6>.
- Robert Kleinberg, Aleksandrs Slivkins, and Eli Upfal. Bandits and experts in metric spaces. *J. ACM*, 66(4), may 2019. ISSN 0004-5411. doi: 10.1145/3299873. URL <https://doi.org/10.1145/3299873>.
- Tor Lattimore and Csaba Szepesvari. Bandit algorithms. 2017. URL <https://tor-lattimore.com/downloads/book/book.pdf>.
- Tor Lattimore, Csaba Szepesvari, and Gellert Weisz. Learning with good feature representations in bandits and in rl with a generative model. In *International Conference on Machine Learning*, pp. 5662–5670. PMLR, 2020.
- Kimin Lee, Laura Smith, Anca Dragan, and Pieter Abbeel. B-pref: Benchmarking preference-based reinforcement learning, 2021. URL <https://arxiv.org/abs/2111.03026>.
- Tyler Lelang and Andrew Lamperski. Simple algorithms for dueling bandits, 2019. URL <https://arxiv.org/abs/1906.07611>.
- Zihan Li and Jonathan Scarlett. Gaussian process bandit optimization with few batches. In *International Conference on Artificial Intelligence and Statistics*, pp. 92–107. PMLR, 2022.
- Ellen R. Novoseller, Yibing Wei, Yanan Sui, Yisong Yue, and Joel W. Burdick. Dueling posterior sampling for preference-based reinforcement learning, 2019. URL <https://arxiv.org/abs/1908.01289>.
- Aadirupa Saha and Pierre Gaillard. Versatile dueling bandits: Best-of-both-world analyses for online learning from preferences, 2022. URL <https://arxiv.org/abs/2202.06694>.
- Lajos Takács. On a generalization of the arc-sine law. *The Annals of Applied Probability*, 6(3): 1035–1040, 1996.

Claire Vernade, Olivier Cappé, and Vianney Perchet. Stochastic bandit models for delayed conversions. *ArXiv*, abs/1706.09186, 2017.

Claire Vernade, Andras Gyorgy, and Timothy Mann. Non-stationary delayed bandits with intermediate observations. In Hal Daumé III and Aarti Singh (eds.), *Proceedings of the 37th International Conference on Machine Learning*, volume 119 of *Proceedings of Machine Learning Research*, pp. 9722–9732. PMLR, 13–18 Jul 2020. URL <https://proceedings.mlr.press/v119/vernade20b.html>.

Christian Wirth, Riad Akrou, Gerhard Neumann, and Johannes Fürnkranz. A survey of preference-based reinforcement learning methods. *J. Mach. Learn. Res.*, 18(1):4945–4990, jan 2017. ISSN 1532-4435.

Yichong Xu, Ruosong Wang, Lin F. Yang, Aarti Singh, and Artur Dubrawski. Preference-based reinforcement learning with finite-time guarantees, 2020. URL <https://arxiv.org/abs/2006.08910>.

Yisong Yue, Josef Broder, Robert Kleinberg, and Thorsten Joachims. The k-armed dueling bandits problem. *Journal of Computer and System Sciences*, 78(5):1538–1556, 2012. ISSN 0022-0000. doi: <https://doi.org/10.1016/j.jcss.2011.12.028>. URL <https://www.sciencedirect.com/science/article/pii/S0022000012000281>. JCSS Special Issue: Cloud Computing 2011.

## A PROOFS OF INSTANCE DEPENDENT STOCHASTIC ANALYSIS

### A.1 PROOF OF INSTANCE DEPENDENT LOWER BOUND AND LEMMAS

**Lemma 2** (Separation lemma). *Let  $G_t, G'_t$  be two independent random walks defined as:*

$$G_{t+1} = G_t + \epsilon_t \quad \text{and} \quad G'_{t+1} = G'_t + \epsilon'_t,$$

*where  $G_0 = G'_0 = 0$  and the drifts satisfy  $\mathbb{E}[\epsilon_t] = p > q = \mathbb{E}[\epsilon'_t]$ . Then:*

$$\mathbb{P}\left(\forall t, t' \in \mathbb{N}^* \quad G_t/t \geq G'_{t'}/t'\right) > 0.$$

*Proof.* Let us consider the random walk

$$\tilde{G}_{t+1} = \tilde{G}_t + \epsilon_t - \frac{p+q}{2}.$$

Being  $\mathbb{E}[\epsilon_t - \frac{p+q}{2}] > 0$ , from the well-known fact that a random walk with drift is transient, we know that there is a strictly positive probability that  $\{\tilde{G}_t > 0, \forall t > 0\}$ .

On the opposite side, we can see that the random walk

$$\tilde{G}'_{t+1} = \tilde{G}'_t + \epsilon'_t - \frac{p+q}{2}$$

satisfies the opposite inequality,  $\mathbb{E}[\epsilon'_t - \frac{p+q}{2}] < 0$ , so that, for the same reason, the event  $\{\tilde{G}'_t < 0, \forall t > 0\}$  has a strictly positive probability.

Therefore, being the two processes independent, one has

$$\mathbb{P}\left(\bigcap_{t, t'=1}^{\infty} \{\tilde{G}_{t+1} > 0, \tilde{G}'_{t'+1} < 0\}\right) > 0,$$

which entails:

$$\begin{aligned} 0 &< \mathbb{P}\left(\bigcap_{t, t'=1}^{\infty} \{\tilde{G}_t > 0, \tilde{G}'_{t'} < 0\}\right) \\ &= \mathbb{P}\left(\bigcap_{t, t'=1}^{\infty} \{G_t - t\frac{p+q}{2} > 0, G'_{t'} - t'\frac{p+q}{2} < 0\}\right) \\ &= \mathbb{P}\left(\bigcap_{t, t'=1}^{\infty} \{G_t/t > \frac{p+q}{2}, G'_{t'}/t' < \frac{p+q}{2}\}\right) \\ &= \mathbb{P}\left(\bigcap_{t, t'=1}^{\infty} \{G_t/t > G'_{t'}/t'\}\right). \end{aligned}$$

which can be reformulated as in the statement.  $\square$

In order to prove the lower bound, we will need the following Lemma.

**Lemma 3.** *Let  $\{X_n\}_n$  be a sequence of i.i.d. Bernoulli random variables. Then, for every event  $E \in \mathcal{F}_n$ , where  $\mathcal{F}_n$  is the filtration generated by  $X_1, \dots, X_n$ ,*

$$\mathbb{P}_{X_1, \dots, X_n \sim \text{Be}(p)}(E) \leq \mathbb{P}_{X_1, \dots, X_n \sim \text{Be}(p')}(E) \max\left(\frac{p}{p'}, \frac{1-p}{1-p'}\right)^n$$

*Proof.* Without loss of generality, let us assume that  $p' < p$ .

$$\begin{aligned}
\mathbb{P}_{X_1, \dots, X_n \sim \text{Be}(p)}(E) &= \int_{\{0,1\}^n} \mathbf{1}_E(\underline{x}) \prod_{i=1}^n p^{x_i} (1-p)^{1-x_i} d\underline{x} \\
&\leq \int_{\{0,1\}^n} \mathbf{1}_E(\underline{x}) \prod_{i=1}^n (p/p')^{x_i} p'^{x_i} (1-p')^{1-x_i} d\underline{x} \\
&\leq \left(\frac{p}{p'}\right)^n \int_{\{0,1\}^n} \mathbf{1}_E(\underline{x}) \prod_{i=1}^n p'^{x_i} (1-p')^{1-x_i} d\underline{x} \\
&= \left(\frac{p}{p'}\right)^n \mathbb{P}_{X_1, \dots, X_n \sim \text{Be}(p')}(E).
\end{aligned} \tag{1}$$

where Inequality (1) follows from the assumption  $p' < p$ . The other way round can be proved substituting  $p$  and  $p'$ .  $\square$

We can now prove the following instance dependent lower bound.

**Theorem 1** (Instance-dependent lower bound). *Let  $\pi$  be any policy for the bandits with ranking feedback, then, for any  $C(\cdot) : [0, +\infty) \rightarrow [0, +\infty)$ , there is  $\{\Delta_i\}_{i \in [n]}$  and a time horizon  $T > 0$  such that  $R_T > \sum_{i=1}^n C(\Delta_i) \log(T)$ .*

*Proof.* Let  $p_1 = 0.5$ ,  $p_2 = 0.5 - \varepsilon$ ,  $p_2^* = 0.5 + \varepsilon$ . Let us consider two problems:

$$P : \begin{cases} \nu_1 = \text{Be}(p_1) \\ \nu_2 = \text{Be}(p_2) \end{cases} \quad P^* : \begin{cases} \nu_1 = \text{Be}(p_1) \\ \nu_2 = \text{Be}(p_2^*) \end{cases}$$

Clearly, the optimal arm is 1 for  $P$  and 2 for  $P^*$ . Let us now define the following event on the rankings received:

$$E_t = \bigcap_{\tau=1}^t \{\mathcal{R}_\tau = \langle 1, 2 \rangle\}.$$

The event  $E_t$  can be interpreted as "up to time  $t$ , we have always observed the ranking  $\langle 1, 2 \rangle$ ".

Let  $\pi$  be any policy. Then, at least one of the following is true:

- the policy is "light tail":

$$\liminf_{t \rightarrow \infty} \frac{\sum_{\tau=1}^t \pi(\text{pull } 2 | E_\tau)}{\log(t)} = c_\pi < +\infty.$$

- the policy is "heavy tailed":

$$\limsup_{t \rightarrow \infty} \frac{\sum_{\tau=1}^t \pi(\text{pull } 2 | E_\tau)}{\log(t)} = +\infty.$$

In this latter case, it is obvious that the regret cannot be logarithmic in  $t$ , so we will focus on light-tailed policies.

Considering the first case, there is a sequence of times  $t_k$  such that

$$\lim_k \frac{\mathbb{E}_P[Z_2(t_k) | E_{t_k}]}{\log(t_k)} = c_\pi.$$

Where the expectation is over the random variables of the arms following the distribution given in  $(P)$ . Therefore, by Markov's inequality, we have, for sufficiently large  $k$ ,

$$\forall h > 0 \quad \mathbb{P}_P(Z_2(t_k) < h | E_{t_k}) \geq 1 - \frac{2c_\pi \log(t_k)}{h}.$$

Now, notice that the event  $Z_2(t_k) < h$  is contained in the  $\sigma$ -algebra generated by the first  $h$  pulls of 2 (and all the pulls of arm 1, but this is irrelevant since  $\nu_1$  corresponds to the same distribution in the two problems). Therefore, from Lemma 3 we have:

$$\begin{aligned} \forall h > 0 \quad \mathbb{P}_{P^*}(Z_2(t_k) < h) &\geq \left(\frac{0.5 - \varepsilon}{0.5 + \varepsilon}\right)^h \mathbb{P}_P(Z_2(t_k) < h) \\ &\geq \left(\frac{0.5 - \varepsilon}{0.5 + \varepsilon}\right)^h \mathbb{P}_P(Z_2(t_k) < h, E_{t_k}) \\ &= \left(\frac{0.5 - \varepsilon}{0.5 + \varepsilon}\right)^h \mathbb{P}_P(Z_2(t_k) < h | E_{t_k}) \mathbb{P}_P(E_{t_k}). \end{aligned}$$

Thus, we have

1. From the previous steps,

$$\forall h > 0 \quad \mathbb{P}_P(Z_2(t_k) < h | E_{t_k}) \geq 1 - \frac{2c_\pi \log(t_k)}{h}.$$

2.  $\inf_{t>0} \mathbb{P}_P(E_t) = q > 0$  thanks to Lemma 2.

The two point together entail that

$$\forall h > 0 \quad \mathbb{P}_{P^*}(Z_2(t_k) < h) \geq q \left(1 - \frac{2c_\pi \log(t_k)}{h}\right) \left(\frac{0.5 - \varepsilon}{0.5 + \varepsilon}\right)^h.$$

Here, for every  $\varepsilon > 0$  the inequality  $\frac{0.5 - \varepsilon}{0.5 + \varepsilon} \geq 1 - 4\varepsilon$  holds, so that

$$\forall h > 0 \quad \left(\frac{0.5 - \varepsilon}{0.5 + \varepsilon}\right)^h \geq (1 - 4\varepsilon)^h,$$

therefore, taking  $h = 4c_\pi \log(t_k)$ , we have:

$$\begin{aligned} \mathbb{P}_{P^*}(Z_2(t_k) < 2c_\pi \log(t_k)) &\geq \frac{q}{2} e^{4c_\pi \log(t_k) \log(1 - 4\varepsilon)} \\ &\geq \frac{q}{2} e^{-4c_\pi \log(t_k) 4\varepsilon} \\ &= \frac{q}{2} t_k^{-4c_\pi 4\varepsilon}. \end{aligned}$$

If we then put  $\varepsilon < \frac{1}{17c_\pi}$ , we have this lower bound on the regret in case of instance  $P^*$ :

$$\begin{aligned} R_{t_k} |_{\sim P^*} &\geq \varepsilon \mathbb{E}_{P^*}[(t_k - Z_2(t_k))] \\ &\geq \varepsilon(t_k - 2c_\pi \log(t_k)) \mathbb{P}_{P^*}(Z_2(t_k) < 2c_\pi \log(t_k)) \\ &\geq \frac{1}{2} \varepsilon t_k \mathbb{P}_{P^*}(Z_2(t_k) < 2c_\pi \log(t_k)) \\ &\geq \frac{q}{4} \varepsilon t_k^{-16/17} t_k = \frac{q}{4} \varepsilon t_k^{1/17}. \end{aligned}$$

which grows polynomially with time. Therefore, whichever the value of  $C(\Delta_i)$  (which is  $C(\varepsilon)$  in this case), we can always find  $T$  in the sequence  $t_k$  such that

$$R_t |_{\sim P^*} \geq \frac{q}{4} \varepsilon t^{1/17} > C(\varepsilon) \log(t).$$

□

## A.2 PROOF OF INSTANCE DEPENDENT UPPER BOUND

**Theorem 2** (Instance-dependent upper bound). *Assume that the reward distribution of every arm is 1-subgaussian. Let  $f : (0, \infty) \rightarrow \mathbb{R}$  be a superlogarithmic function in  $t$ , then there is a term  $C(f, \Delta_i)$  for each sub-optimal arm  $i \in [n]$  which does not depend on  $T$ , such that Algorithm 1 satisfies:*

$$R_T \leq f(T) \sum_{i=1}^n \Delta_i + \log(T) \sum_{i=1}^n C(f, \Delta_i).$$

*Proof.* Let  $i^* \in [n]$  be the optimal arm, and let  $Z_i(t)$  the number of pulls of arm  $i$  up to time  $t$ . For any sub-optimal arm  $a_i$ , we have

$$\mathbb{E}[Z_i(t)] = \sum_{\tau=1}^t \mathbb{P}(I_\tau = i) \quad (2)$$

$$= \sum_{\tau=1}^t \mathbb{P}(I_\tau = i, Z_i(\tau-1) < f(\tau)) + \sum_{\tau=1}^t \mathbb{P}(I_\tau = i, Z_i(\tau-1) \geq f(\tau)), \quad (3)$$

where we let  $I_\tau$  be the arm pulled at time  $\tau \in [T]$ . We split the proof in two parts, providing a bound for each term defining Equation (3).

**Claim 1:** The first term of Equation (3) is bounded by  $f(t)$ . indeed, notice that if:

$$\sum_{\tau=1}^t \mathbf{1}\{I_\tau = i, Z_i(\tau-1) < f(\tau)\} \geq f(t),$$

then, there is  $t_0 \leq t$  such that  $Z_i(t_0) = f(t) - 1$ . Thus, we could rewrite the latter term as follows:

$$\sum_{\tau=1}^{t_0} \mathbf{1}\{I_\tau = i, Z_i(\tau-1) < f(\tau)\} + \sum_{\tau=t_0+1}^t \mathbf{1}\{I_\tau = i, Z_i(\tau-1) < f(\tau)\}$$

By definition, the first sum is bounded by  $f(t)$ , while the second one is bounded by

$$\sum_{\tau=t_0+1}^t \mathbf{1}\{I_\tau = i, Z_i(\tau-1) < f(t)\} = 0.$$

since, for  $\tau > t_0$ ,  $Z_i(\tau-1) \geq f(t)$ .

**Claim 2:** The second term is bounded by  $C(\Delta_i) \log(t)$  for some  $C(\Delta_i)$ .

We know, by design of the algorithm, that the arm  $a_i$  can be pulled only if:

1. It has the highest empirical mean.
2. Every other arm has been pulled at least  $f(t)$  times, including arm  $i^*$ .

In particular, defining the event:

$$E_{i,t} := \{Z_i(t) \geq f(t)\}$$

we have:

$$\mathbb{P}(I_\tau = i, Z_i(\tau-1) \geq f(\tau)) \leq \mathbb{P}(\bar{X}_{i,\tau} > \bar{X}_{i^*,\tau}, E_{i,t}, E_{i^*,t})$$

which can be true only if at least one of the following holds:

1.  $\bar{X}_{i,\tau} > \mu_i + \Delta_i/2$ , which, intersected with  $E_{i,\tau}$ , by Hoeffding's inequality is true with probability at most:

$$\begin{aligned} \mathbb{P}(\bar{X}_{i,\tau} > \mu_i + \Delta_i/2, E_{i,\tau}) &\leq \sum_{y=f(\tau)}^{\infty} \mathbb{P}(\bar{X}_{i,\tau} > \mu_i + \Delta_i/2, Z_i(\tau) = y) \\ &\leq \sum_{y=f(\tau)}^{\infty} e^{-\frac{y\Delta_i^2}{2}} = \frac{e^{-\frac{f(\tau)\Delta_i^2}{2}}}{1 - e^{-\Delta_i^2/2}} \end{aligned}$$

2.  $\bar{X}_{i^*,\tau} < \mu_* + \Delta_i/2$ , which, intersected to  $E_{i^*,\tau}$ , by Hoeffding's inequality is also true with the same probability of before.

Therefore, we have proved that:

$$\sum_{\tau=1}^t \mathbb{P}(I_\tau = i, Z_i(\tau-1) \geq f(\tau)) \leq 2(1 - e^{-\Delta_i^2/2})^{-1} \sum_{\tau=1}^t e^{-\frac{f(\tau)\Delta_i^2}{2}},$$

which grows slower than  $\log(t)$ . Indeed, being  $f(\cdot)$  superlogarithmic, we have:

$$\lim_{t \rightarrow \infty} t e^{-\frac{f(t)\Delta_i^2}{2}} = \lim_{t \rightarrow \infty} t e^{-\log(t) \frac{f(t)\Delta_i^2}{2 \log(t)}} = \lim_{t \rightarrow \infty} t \left( \frac{1}{t} \right)^{\frac{f(t)\Delta_i^2}{2 \log(t)}} = 0.$$

Thus, for every  $c > 0$ , we can find  $t_0$  satisfying  $e^{-\frac{f(t)\Delta_i^2}{2}} \leq \frac{c}{t} \forall t \geq t_0$ , so that:

$$\lim_{t \rightarrow \infty} \frac{\sum_{\tau=1}^t e^{-\frac{f(\tau)\Delta_i^2}{2}}}{c \log(t)} \leq \lim_{t \rightarrow \infty} \frac{\sum_{\tau=1}^t e^{-\frac{f(\tau)\Delta_i^2}{2}}}{c \sum_{\tau=1}^t \frac{1}{\tau}} \leq \lim_{t \rightarrow \infty} \underbrace{\frac{\sum_{\tau=1}^{t_0} e^{-\frac{f(\tau)\Delta_i^2}{2}}}{c \sum_{\tau=1}^t \frac{1}{\tau}}}_{\rightarrow 0} + \underbrace{\frac{\sum_{\tau=t_0}^t e^{-\frac{f(\tau)\Delta_i^2}{2}}}{c \sum_{\tau=t_0}^t \frac{1}{\tau}}}_{\leq 1} \leq 1.$$

This fact allows us to state (since a convergent sequence is always bounded) that:

$$C_0(\Delta_i) = 2(1 - e^{-\Delta_i^2/2})^{-1} \sup_{t > 1} \frac{\sum_{\tau=1}^t e^{-\frac{f(\tau)\Delta_i^2}{2}}}{\log(t)} < +\infty,$$

proving that for every suboptimal arm  $i$

$$\mathbb{E}[Z_i(t)] \leq f(t) + C_0(\Delta_i) \log(t)$$

To conclude the proof, it is sufficient to redefine  $C(\Delta_i) := \Delta_i C_0(\Delta_i)$  and see that:

$$R_t = \sum_{i=1}^N \Delta_i \mathbb{E}[Z_i(t)].$$

□

**Corollary 9.** Let  $\delta > 0$  and  $f(t) = \log(t)^{1+\delta}$  be the sperlogarithmic function used in Algorithm 1, then we have:

$$C(f, \Delta_i) = \frac{2\Delta_i \left( e^{((2/\Delta_i^2)^{1/\delta})} + 1 \right)}{1 - e^{-\Delta_i^2/2}}$$

*Proof.* Let  $t_0 \in \mathbb{N}$  be smallest integer such that:

$$e^{-\frac{1}{2} \log(t)^{1+\delta} \Delta_i^2} \leq \frac{1}{t}, \quad \forall t \geq t_0 > 1.$$



By rearranging the latter inequality we have that:

$$t_0 = \lceil e^{((2/\Delta_i^2)^{1/\delta})} \rceil.$$

From the previous proof, it was known that  $C(\Delta_i, f) = \Delta_i C_0(\Delta_i)$ , where

$$C_0(\Delta_i) = 2(1 - e^{-\Delta_i^2/2})^{-1} \sup_{t>1} \frac{\sum_{\tau=1}^t e^{-\frac{f(\tau)\Delta_i^2}{2}}}{\log(t)}.$$

Therefore, we have for this specific choice of  $f$ ,

$$\begin{aligned} C_0(\Delta_i) \log(t) &\leq 2(1 - e^{-\Delta_i^2/2})^{-1} \sum_{\tau=1}^t e^{-\frac{f(\tau)\Delta_i^2}{2}} \\ &\leq 2(1 - e^{-\Delta_i^2/2})^{-1} \frac{\sum_{\tau=1}^t e^{-\frac{f(\tau)\Delta_i^2}{2}}}{\log(t)} \log(t) \\ &\leq 2(1 - e^{-\Delta_i^2/2})^{-1} \left( \frac{\sum_{\tau=1}^{t_0} e^{-\frac{f(\tau)\Delta_i^2}{2}}}{\log(t)} + \frac{\sum_{\tau=t_0}^t e^{-\frac{f(\tau)\Delta_i^2}{2}}}{\sum_{\tau=t_0}^t \frac{1}{\tau}} \right) \log(t) \end{aligned}$$

Where the last step is due to the fact that for  $t_0 > 2$  we have  $\sum_{\tau=t_0}^t \frac{1}{\tau} \leq \log(t)$ . From this point, we can note that in the fraction  $\frac{\sum_{\tau=t_0}^t e^{-\frac{f(\tau)\Delta_i^2}{2}}}{\sum_{\tau=t_0}^t \frac{1}{\tau}}$  for fixed  $\tau$ , each term of the upper sum  $e^{-\frac{f(\tau)\Delta_i^2}{2}}$  is less or equal than each term of the lower  $\frac{1}{\tau}$ . Therefore, we have

$$\frac{\sum_{\tau=t_0}^t e^{-\frac{f(\tau)\Delta_i^2}{2}}}{\sum_{\tau=t_0}^t \frac{1}{\tau}} \leq 1.$$

With this consideration, we are able to conclude:

$$\begin{aligned} C_0(\Delta_i) &\leq 2(1 - e^{-\Delta_i^2/2})^{-1} \left( \frac{\sum_{\tau=1}^{t_0} e^{-\frac{f(\tau)\Delta_i^2}{2}}}{\log(t)} + \frac{\sum_{\tau=t_0}^t e^{-\frac{f(\tau)\Delta_i^2}{2}}}{\sum_{\tau=t_0}^t \frac{1}{\tau}} \right) \\ &\leq 2(1 - e^{-\Delta_i^2/2})^{-1} \left( \frac{t_0}{\log(t)} + 1 \right) \\ &\leq 2(1 - e^{-\Delta_i^2/2})^{-1} + 2(1 - e^{-\Delta_i^2/2})^{-1} e^{((2/\Delta_i^2)^{1/\delta})}. \end{aligned}$$

Where in the last passage we have used the fact that  $\log(t) > 1$  for  $t > 2$ . Recollecting all the terms we have that:

$$C(\Delta_i, \log(t)^{1+\delta}) = \Delta_i C_0(\Delta_i, \log(t)^{1+\delta}) \leq 2\Delta_i (1 - e^{-\Delta_i^2/2})^{-1} (e^{((2/\Delta_i^2)^{1/\delta})} + 1),$$

concluding the proof. □

## B PROOFS IN THE INSTANCE INDEPENDENT STOCHASTIC ANALYSIS

### B.1 INSTANCE DEPENDENT/INDEPENDENT TRADE-OFF

**Lemma 4.** *Let us define a random walk*

$$G_{t+1} = G_t + \epsilon_t \quad \epsilon_t = \begin{cases} 1 & p \\ -1 & 1-p \end{cases}.$$

where  $G_0 = 1$ , with  $p = 1 + \Delta/2 > 0.5$ . Then, we have

$$\mathbb{P} \left( \bigcup_{t=1}^{\infty} \{G_t \leq 0\} \right) = \left( \frac{1-\Delta}{1+\Delta} \right).$$

*Proof.* Define

$$f_n = \mathbb{P}(G_0 = n, \exists t : G_t = 0)$$

which satisfies, for  $n \geq 0$ :

$$f_n = pf_{n-1} + (1-p)f_{n+1}$$

with  $f_n = 1$  for  $n \leq 0$ . The equation corresponding to the aforementioned dynamical system is:

$$(1-p)\lambda^2 - \lambda + p = 0$$

which has two solutions:

$$\lambda = \frac{1 \pm \sqrt{1 - 4p(1-p)}}{2(1-p)}$$

Thus, we obtain,  $\forall n > 0$

$$f_n = A \left( \frac{1 + \sqrt{1 - 4p(1-p)}}{2(1-p)} \right)^n + B \left( \frac{1 - \sqrt{1 - 4p(1-p)}}{2(1-p)} \right)^n$$

where  $A = 0$  (otherwise, the equation does not define a probability) and  $B = 1$  (since  $f_1 \rightarrow 1$  for  $\Delta \rightarrow 0$ ). Therefore, from the definition of  $p$ :

$$\begin{aligned} f_n &= \left( \frac{1 - \sqrt{1 - 4p(1-p)}}{2(1-p)} \right)^n \\ &= \left( \frac{1 - \sqrt{1 - 4(1/2 - \Delta/2)(1/2 + \Delta/2)}}{1 + \Delta} \right)^n \\ &= \left( \frac{1 - \Delta}{1 + \Delta} \right)^n. \end{aligned}$$

for  $n = 1$  we have the result.  $\square$

**Theorem 4** (Instance Dependent/Independent Trade-off). *Let  $\pi$  be any policy for the bandits with ranking feedback problem. If  $\pi$  satisfies the following properties:*

- (instance-dependent upper regret bound)  $R_T \leq \sum_{i=1}^n C(\Delta_i)T^\alpha$
- (instance-independent upper regret bound)  $R_T \leq nCT^\beta$

then,  $2\alpha + \beta \geq 1$ , where  $\alpha, \beta \geq 0$ .

*Proof.* Let  $p_1 = 0.5$ ,  $p_2 = 0.5 - \varepsilon$ ,  $p_2^* = 0.5 + \varepsilon$ . Let us consider two problems:

$$P : \begin{cases} \nu_1 = Be(p_1) \\ \nu_2 = Be(p_2) \end{cases} \quad P^* : \begin{cases} \nu_1 = Be(p_1) \\ \nu_2 = Be(p_2^*) \end{cases}$$

Clearly, the optimal arm is 1 for  $P$  and 2 for  $P^*$ . Let us now define the event:

$$E_t = \bigcap_{\tau=1}^t \{\mathcal{R}_\tau = \langle 1, 2 \rangle\}.$$

By assumption, policy  $\pi$  has a sub- $t^\alpha$  instance-dependent regret, therefore,

$$\forall \eta > 0, \limsup_{t \rightarrow \infty} \frac{\sum_{\tau=1}^t \pi(\text{pull } 2 | E_\tau)}{t^{\alpha+\eta}} = 0,$$

otherwise we would have an instance dependent regret of order  $t^{\alpha+\eta}$  in the simple case of  $p_1 = 1$ ,  $p_2 = 0$ . This means that:

$$\limsup_t \frac{\mathbb{E}_P[Z_2(t) | E_t]}{t^{\alpha+\eta}} = 0 \implies \exists C > 0 \forall t > 0 : \quad \mathbb{E}_P[Z_2(t) | E_t] \leq Ct^{\alpha+\eta}.$$

Where  $\mathbb{E}_P$  is the expectation over the random variables of the arms following the distribution given in  $(P)$ . Therefore, by Markov's inequality, we have,

$$\mathbb{P}_P(Z_2(t) > 2Ct^{\alpha+\eta}|E_t) \leq \frac{\mathbb{E}_P[Z_2(t)|E_t]}{2Ct^{\alpha+\eta}} \leq \frac{Ct^{\alpha+\eta}}{2Ct^{\alpha+\eta}} \leq \frac{1}{2}.$$

Now, note that for every  $h > 0$  the event  $Z_2(t) < h$  is contained in the  $\sigma$ -algebra generated by the first  $h$  pulls of arm 2 (and all the pulls of arm 1, but this is irrelevant since arm 1 corresponds to the same distribution in the two problems). Therefore, thanks to Lemma 3 we have:

$$\begin{aligned} \forall h > 0 \quad \mathbb{P}_{P^*}(Z_2(t) \leq h) &\geq \left(\frac{0.5 - \varepsilon}{0.5 + \varepsilon}\right)^h \mathbb{P}_P(Z_2(t) \leq h) \\ &\geq \left(\frac{0.5 - \varepsilon}{0.5 + \varepsilon}\right)^h \mathbb{P}_P(T_2(t) \leq h, E_t) \\ &= \left(\frac{0.5 - \varepsilon}{0.5 + \varepsilon}\right)^h \mathbb{P}_P(T_2(t) \leq h|E_t)\mathbb{P}_P(E_t). \end{aligned}$$

By the previous step, we have  $\mathbb{P}_P(Z_2(t) \leq 2Ct^{\alpha+\eta}|E_t) \geq 1/2$ , so that:

$$\mathbb{P}_{P^*}(Z_2(t) \leq 2Ct^{\alpha+\eta}) \geq \frac{1}{2} \left(\frac{0.5 - \varepsilon}{0.5 + \varepsilon}\right)^{2Ct^{\alpha+\eta}} \mathbb{P}_P(E_t),$$

while, thanks to Lemma 4, we have  $\mathbb{P}_P(E_t) \geq 1 - \frac{1-\varepsilon}{1+\varepsilon} \geq 2\varepsilon$ , meaning that:

$$\mathbb{P}_{P^*}(Z_2(t) \leq 2Ct^{\alpha+\eta}) \geq \frac{1}{2} \left(\frac{0.5 - \varepsilon}{0.5 + \varepsilon}\right)^{2Ct^{\alpha+\eta}} \frac{2\varepsilon}{1 + \varepsilon}.$$

At this point we are using this result to provide a lower bound for the regret in the instance independent case. Analyzing the instance independent regret, by definition we have to fix  $t$  as time horizon and let the arm gap  $\varepsilon$  depend on  $t$ .

Let us now fix  $\rho > 1$ . With the choice  $\varepsilon = t^{-\rho\alpha}$ , we have

$$\begin{aligned} \mathbb{P}_{P^*}(Z_2(t) \leq 2Ct^{\alpha+\eta}) &\geq \frac{1}{2} \left(\frac{0.5 - t^{-\rho\alpha}}{0.5 + t^{-\rho\alpha}}\right)^{2Ct^{\alpha+\eta}} 2t^{-\rho\alpha} \\ &\geq \frac{1}{2} \left(1 - 4t^{-\rho\alpha}\right)^{2Ct^{\alpha+\eta}} \frac{2t^{-\rho\alpha}}{1 + t^{-\rho\alpha}} \\ &\geq \left(1 - 4t^{-\rho\alpha}\right)^{2Ct^{\alpha+\eta}} t^{-\rho\alpha}. \end{aligned} \tag{4}$$

At this point if we choose  $\eta = \alpha(\rho - 1)/2$ , the following fact holds:

$$\begin{aligned} \lim_{t \rightarrow \infty} \left(1 - 4t^{-\rho\alpha}\right)^{2Ct^{\alpha+\eta}} &= \lim_{y \rightarrow 0^+} \left(1 - 4y\right)^{Cy^{\frac{-(\alpha+\eta)}{\rho\alpha}}} \\ &= \lim_{y \rightarrow 0^+} \left(1 - 4y\right)^{Cy^{\frac{-\alpha(1/2+\rho/2)}{\rho\alpha}}} \\ &= \lim_{y \rightarrow 0^+} \left(1 - 4y\right)^{Cy^{\frac{-(1/2+\rho/2)}{\rho}}} \end{aligned}$$

where in the first equality we substituted  $y = t^{-\rho\alpha}$ . Here,  $y^{\frac{-(1/2+\rho/2)}{\rho}} = y^{-1} \cdot y^{\frac{\rho-1}{2\rho}}$ , where the second exponent is strictly positive.

$$\begin{aligned} \lim_{t \rightarrow \infty} \left(1 - 4t^{-\rho\alpha}\right)^{2Ct^{\alpha+\eta}} &= \lim_{y \rightarrow 0^+} \left(\left(1 - 4y\right)^{-y}\right)^{Cy^{\frac{\rho-1}{2\rho}}} \\ &= \lim_{y \rightarrow 0^+} (1/e^4)^{Cy^{\frac{\rho-1}{2\rho}}} = 1. \end{aligned}$$

This limit shows that there is  $c_\rho > 0$  such that:

$$\left(1 - 2t^{-\rho\alpha}\right)^{2Ct^{\alpha+\eta}} \geq c_\rho \quad \forall t \text{ sufficiently big.}$$

Substituting this property in the previously found Equation (4), we get:

$$\mathbb{P}_{P^*}(Z_2(t) \leq 2Ct^{\alpha(1/2+\rho/2)}) \geq \frac{c_\rho}{2} t^{-\rho\alpha},$$

holding for every  $\rho > 0$  and sufficiently big  $t$ .

This proves that, with  $\varepsilon = t^{-\rho\alpha}$ :

$$\begin{aligned} R_t|_{\sim P^*} &\geq \varepsilon(t - 2Ct^{\alpha(1/2+\rho/2)})\mathbb{P}_P^*(Z_2(t) \leq 2Ct^{\alpha(1/2+\rho/2)}) \\ &\geq \frac{1}{2}t \cdot \frac{c_\rho}{2}t^{-2\rho\alpha} = \frac{c_\rho}{4}t^{1-2\rho\alpha} \quad \forall t \text{ sufficiently big.} \end{aligned}$$

Therefore, for  $\beta \leq 1 - 2\rho\alpha$  it is not possible to have an upper bound for the instance independent regret. Since this is valid for every  $\rho > 1$ , we can also extend the result to any  $\beta < 1 - 2\alpha$ , which leads to the conclusion that the necessary condition to satisfy both:

- (Instance Dependent regret bound)

$$R_t \leq \sum_{i=1}^n C(\Delta_i)t^\alpha \quad \forall t > 0$$

- (Instance Independent regret bound)

$$R_t \leq nCt^\beta \quad \forall t > 0$$

for the same policy  $\pi$  is

$$2\alpha + \beta \geq 1.$$

□

## B.2 PROOFS OF INSTANCE INDEPENDENT REGRET UPPER BOUND

To understand the tractation of the instance independent regret analysis, we will need some results from the theory of stochastic processes. We devote the following subsections to develop all the results required to prove the regret bound on the algorithm.

### B.2.1 DISCRETIZING THE BROWNIAN MOTION

In this section, we prove some results about the relationship between Random Walk  $G_i$  and Brownian Motion  $B_t$ , that will be crucial in the proof of the regret bound. For this scope, we will introduce this quantity

$$|B_t + t\mu_0 < \eta| = \int_0^1 \mathbf{1}_{(-\infty, \eta)}(\tau) d\tau,$$

corresponding to the Lebesgue measure of the set  $\{t \in [0, 1] : B_t + t\mu_0 < \eta\}$ .

We start with a lemma that bounds the increments in a standard brownian Motion.

**Lemma 5.** *Let  $(B_t)_{t \in [0,1]}$  be a standard Brownian motion. Define*

$$\forall i \in \{0, \dots, n-1\}, \quad I_i := [i/n, (i+1)/n].$$

*Then, for every  $\eta \geq 0$ ,*

$$\mathbb{P}\left(\sup_{i \in \{0, \dots, n-1\}} (\sup_{t \in I_i} B_t - B_{i/n}) \geq \eta\right) = \mathbb{P}\left(\inf_{i \in \{0, \dots, n-1\}} (\inf_{t \in I_i} B_t - B_{i/n}) \leq -\eta\right) \leq \frac{2\sqrt{n} \exp\left(-\frac{\eta^2 n}{2\sigma^2}\right)}{\eta/\sigma\sqrt{2\pi}}.$$

*Proof.* Indeed, the Brownian motion satisfies:

$$\begin{aligned}
\mathbb{P}\left(\sup_{i \in \{0, \dots, n-1\}} \left(\sup_{t \in I_i} B_t - B_{i/n}\right) \geq \eta\right) &= \mathbb{P}\left(\bigcup_{i=0}^{n-1} \sup_{t \in I_i} B_t - B_{i/n} > \eta\right) \\
&\leq \sum_{i=0}^{n-1} \mathbb{P}\left(\sup_{t \in I_i} B_t - B_{i/n} > \eta\right) \\
&= \sum_{i=0}^{n-1} 2\mathbb{P}(B_{(i+1)/n} - B_{i/n} > \eta) \\
&= \sum_{i=0}^{n-1} 2\mathbb{P}(\mathcal{N}(0, \sigma^2/n) > \eta) \\
&\leq \sum_{i=0}^{n-1} \frac{2 \exp\left(-\frac{\eta^2 n}{2\sigma^2}\right)}{\eta/\sigma\sqrt{2n\pi}} \leq \frac{2\sqrt{n} \exp\left(-\frac{\eta^2 n}{2\sigma^2}\right)}{\eta/\sigma\sqrt{2\pi}}.
\end{aligned}$$

where the third equality holds from the reflection principle (see (Baldi, 2017)), and last inequality holds since it is well-known that  $\mathbb{P}(\mathcal{N}(0, \beta^2) > y) \leq \frac{\exp(-y^2/2\beta^2)}{y/\beta\sqrt{2\pi}}$  for tail bound on Gaussian distributions.

In the exact same way, we can prove that

$$\mathbb{P}\left(\inf_{i \in \{0, \dots, n-1\}} \left(\inf_{t \in I_i} B_t - B_{i/n}\right) \leq -\eta\right) \leq \frac{2\sqrt{n} \exp\left(-\frac{\eta^2 n}{2\sigma^2}\right)}{\eta/\sigma\sqrt{2\pi}}.$$

Together, the two results imply the thesis.  $\square$

We are now ready to prove a theorem that links the Brownian Motion and a Random Walk in term of the probability that each of them stays in the interval  $[0, \infty)$ .

**Lemma 6.** (*Discretization lemma*) *Let  $(G_i)_{i \in \{0, \dots, n-1\}}$  be a Gaussian 0-mean unit variance random walk, and  $\mu \in \mathbb{R}$ , and  $(B_t)_{t \in [0, 1]}$  a standard Brownian motion. Then, for every  $s \in (0, 1)$  we have,*

$$\mathbb{P}(|B_t + t\mu_0| > \eta) > s - P(n, \eta) \leq \mathbb{P}\left(\sum_{i=0}^{n-1} \mathbf{1}_{(0, \infty)}(G_i + i\mu) > sn\right) \leq \mathbb{P}(|B_t + t\mu_0| > -\eta) > s + P(n, \eta)$$

and

$$\mathbb{P}(|B_t + t\mu_0| \leq \eta) \leq s - P(n, \eta) \leq \mathbb{P}\left(\sum_{i=0}^{n-1} \mathbf{1}_{(-\infty, 0]}(G_i + i\mu) \leq sn\right) \leq \mathbb{P}(|B_t + t\mu_0| \leq -\eta) \leq s + P(n, \eta)$$

with  $P(n, \eta) = \frac{2\sqrt{n} \exp(-\eta^2 n/2)}{\eta\sqrt{2\pi}}$  and  $\mu_0 = \sqrt{n}\mu$ .

*Proof.* We only prove the first part, as the second one follows trivially by substituting  $s \leftarrow 1 - s$ ,  $\mu \leftarrow -\mu$ ,  $G_i \leftarrow -G_i$ ,  $B_t \leftarrow -B_t$ .

Let  $(B_t)_{t \in [0, 1]}$  be a standard Brownian motion. Define

$$\forall i \in \{0, \dots, n-1\}, \quad I_i := [i/n, (i+1)/n].$$

Let us set

$$\mu_0 = \sqrt{n}\mu.$$

With this definition, we have the following set inclusions, for any  $s \in [0, 1]$  and  $\eta > 0$ :

$$\begin{aligned}
\{|B_t + t\mu_0 > \eta| > s\} &= \left\{ \int_0^1 \mathbf{1}_{(\eta, \infty)}(B_\tau + \tau\mu_0) d\tau > s \right\} \\
&= \left\{ \sum_{i=0}^{n-1} \int_{I_i} \mathbf{1}_{(\eta, \infty)}(B_\tau + \tau\mu_0) d\tau > s \right\} \\
&\subseteq \left\{ \sum_{i=0}^{n-1} \sup_{\tau \in I_i} \mathbf{1}_{(\eta, \infty)}(B_\tau + \tau\mu_0) > sn \right\} \\
&\subseteq \left\{ \sum_{i=0}^{n-1} \mathbf{1}_{(0, \infty)} \left( B_{i/n} + \frac{i}{n} \mu_0 \right) > sn \right\} \cup \left\{ \sup_{i \in \{0, \dots, n-1\}} \left( \sup_{t \in I_i} B_t - B_{i/n} \right) \geq \eta \right\}.
\end{aligned}$$

Moreover, it is also true that, using the same passages

$$\begin{aligned}
\{|B_t + t\mu_0 > -\eta| > s\} &= \left\{ \int_0^1 \mathbf{1}_{(-\eta, \infty)}(B_\tau + \tau\mu_0) d\tau > s \right\} \\
&\supseteq \left\{ \sum_{i=0}^{n-1} \mathbf{1}_{(0, \infty)} \left( B_{i/n} + \frac{i}{n} \mu_0 \right) > sn \right\} \cap \left\{ \inf_{i \in \{0, \dots, n-1\}} \left( \inf_{t \in I_i} B_t - B_{i/n} \right) \geq -\eta \right\}.
\end{aligned}$$

Now, note that the random variable  $B_{i/n}$ , for  $i = 1, \dots, n$  has the same distribution of  $G_i/\sqrt{n}$ , so that

$$\begin{aligned}
\mathbb{P} \left( \sum_{i=0}^{n-1} \mathbf{1}_{(0, \infty)} \left( B_{i/n} + \frac{i}{n} \mu_0 \right) > sn \right) &= \mathbb{P} \left( \sum_{i=0}^{n-1} \mathbf{1}_{(0, \infty)} \left( \sqrt{n} B_{i/n} + \frac{i}{\sqrt{n}} \mu_0 \right) > sn \right) \\
&= \mathbb{P} \left( \sum_{i=0}^{n-1} \mathbf{1}_{(0, \infty)} (G_i + i\mu) > sn \right).
\end{aligned}$$

Therefore, by union bound:

$$\mathbb{P}(|B_t + t\mu_0 > \eta| > s) \leq \mathbb{P} \left( \sum_{i=0}^{n-1} \mathbf{1}_{(0, \infty)} (G_i + i\mu) > sn \right) + \mathbb{P} \left( \sup_{i \in \{0, \dots, n-1\}} \left( \sup_{t \in I_i} B_t - B_{i/n} \right) \geq \eta \right),$$

and

$$\mathbb{P}(|B_t + t\mu_0 > -\eta| > s) \geq \mathbb{P} \left( \sum_{i=0}^{n-1} \mathbf{1}_{(0, \infty)} (G_i + i\mu) > sn \right) - \mathbb{P} \left( \inf_{i \in \{0, \dots, n-1\}} \left( \inf_{t \in I_i} B_t - B_{i/n} \right) \leq -\eta \right).$$

The proof is completed applying lemma 5 and reordering the terms.

□

For our setting, it is convenient to state a corollary of the previous result that will be used in the next proofs.

**Corollary 10.** *Let  $(G_i)_{i \in \{0, \dots, n-1\}}$  be a Gaussian 0-mean unit variance random walk, and  $\mu \in \mathbb{R}$ . Then, for every  $s \in (0, 1)$  we have,*

$$\mathbb{P} \left( \sum_{i=0}^{n-1} \mathbf{1}_{(-\infty, 0]} (G_i + i\mu) \leq sn \right) \in$$

$$\left[ \mathbb{P} \left( \left| B_t + t\mu_0 \leq \frac{2\log(n)}{\sqrt{n}} \right| \leq s \right) - \frac{\sqrt{2}}{\sqrt{\pi n \log(n)}}, \quad \mathbb{P} \left( \left| B_t + t\mu_0 \leq -\frac{2\log(n)}{\sqrt{n}} \right| \leq s \right) + \frac{\sqrt{2}}{\sqrt{\pi n \log(n)}} \right],$$

where  $\mu_0 = \sqrt{n}\mu$ .

*Proof.* It is sufficient to make the substitution

$$\eta = \frac{2\log(n)}{\sqrt{n}},$$

in the previous lemma. Indeed, we have

$$\begin{aligned} P(n, \eta) &= \frac{2\sqrt{n} \exp(-\eta^2 n/2)}{\eta\sqrt{2\pi}} \\ &= \frac{2\sqrt{n} \exp(-\log(n)^2)}{\frac{\log(n)}{\sqrt{n}}\sqrt{2\pi}} \\ &= \frac{2n \exp(-\log(n)^2)}{\log(n)\sqrt{2\pi}} = \frac{\sqrt{2}}{\sqrt{\pi n \log(n)}}. \end{aligned}$$

□

## B.2.2 PROOFS OF FILTERING INEQUALITIES

All the proof of this subsections will be based on the following very powerful result, which studies the time spent by a Brownian Motion with drift in the half-line  $[0, \infty)$ .

**Theorem 11** ((Takács, 1996)). *Let  $B_t$  be a standard Brownian motion on  $t \in [0, 1]$ , and let us note as  $|\cdot|$  the Lebesgue measure of a set. For  $\mu_0 \in \mathbb{R}$  and  $\eta > 0$ , we have*

$$\mathbb{P}(|B_t + t\mu_0 \leq \eta| \leq s) = 2 \int_0^s \left[ \frac{\varphi(\mu_0\sqrt{1-\tau})}{\sqrt{1-\tau}} + \mu_0\Phi(\mu_0\sqrt{1-\tau}) \right] \times \left[ \frac{\varphi(\eta/\sqrt{\tau} - \mu_0\sqrt{\tau})}{\sqrt{\tau}} - \mu_0 e^{2\mu_0\eta}\Phi(-\eta/\sqrt{\tau} - \mu_0\sqrt{\tau}) \right] d\tau,$$

where

$$\varphi(x) := \frac{1}{\sqrt{2\pi}} e^{-x^2/2} \quad \Phi(x) := \int_{-\infty}^x \varphi(u) du.$$

With this theorem, we can prove the following crucial results

**Theorem 12.** *Let  $T$  be a sufficiently large constant. Let  $(G_i)_{i \in \{0, \dots, n-1\}}$  be a Gaussian 0-mean unit variance random walk, and  $\mu \in \mathbb{R}$ . If  $\mu \geq CT^{-\alpha}$ , for some  $\alpha \in (0, 1/2)$  and  $C = 4\log(T)$ , then setting  $n = \lceil T^{1/2+\alpha} \rceil$  we have*

$$\mathbb{P} \left( \sum_{i=0}^{n-1} \mathbf{1}_{(-\infty, 0]}(G_i + i\mu) \leq T^{2\alpha} \right) \geq 1 - 2T^{-1/2}.$$

*Proof.* In the rest of the proof, we will assume, for ease of notation, that  $T$  is such that  $T^{1/2+\alpha}$  an integer, so that  $n = T^{1/2+\alpha}$ . This is done without loss of generality, since substituting  $n$  with  $n+1$  leads to a negligible difference for  $T$  sufficiently big. Applying the discretization corollary 10, we have that for every  $s \in (0, 1)$

$$\mathbb{P} \left( \sum_{i=0}^{n-1} \mathbf{1}_{(-\infty, 0]}(G_i + i\mu) \leq sn \right) \geq \mathbb{P} \left( \left| B_t + t\mu_0 \leq \frac{2\log(n)}{\sqrt{n}} \right| \leq s \right) - \frac{\sqrt{2}}{\sqrt{\pi n \log(n)}}, \quad (5)$$

where  $\mu_0 = \sqrt{n}\mu$ . Therefore, by assumption,

$$\mu_0 = \sqrt{n}\mu \geq (T^{1/2+\alpha})^{1/2}CT^{-\alpha} = CT^{1/4-\alpha/2}.$$

At this point, we can apply theorem 11 to have, for any  $\eta > 0$ ,

$$\begin{aligned} \mathbb{P}(|B_t + t\mu_0 \leq \eta| \leq s) &= 2 \int_0^s \left( \frac{\phi(\mu_0\sqrt{1-\tau})}{\sqrt{1-\tau}} + \mu_0\Phi(\mu_0\sqrt{1-\tau}) \right) \\ &\quad \times \left( \phi\left(\frac{\eta - \mu_0\tau}{\sqrt{\tau}}\right) \frac{1}{\sqrt{\tau}} - \mu_0 e^{2\mu_0\eta} \Phi\left(\frac{-\eta - \mu_0\tau}{\sqrt{\tau}}\right) \right) d\tau \end{aligned}$$

which means that

$$\begin{aligned} \mathbb{P}(|B_t + t\mu_0 \leq \eta| \leq s) &= 1 - 2 \int_s^1 \left( \underbrace{\frac{\phi(\mu_0\sqrt{1-\tau})}{\sqrt{1-\tau}}}_{(1)} + \underbrace{\mu_0\Phi(\mu_0\sqrt{1-\tau})}_{(2)} \right) \\ &\quad \times \left( \underbrace{\phi\left(\frac{\eta - \mu_0\tau}{\sqrt{\tau}}\right) \frac{1}{\sqrt{\tau}}}_{(3)} - \underbrace{\mu_0 e^{2\mu_0\eta} \Phi\left(\frac{-\eta - \mu_0\tau}{\sqrt{\tau}}\right)}_{(4)} \right) d\tau. \end{aligned}$$

Here, we have to consider that

- $\eta = \frac{2\log(n)}{\sqrt{n}} \leq 2\log(T)T^{-\alpha/2-1/4}$
- $\mu_0 \geq CT^{1/4-\alpha/2}$ .

Moreover, to have the thesis, we are interested in a value of  $s$  such that  $sn = T^{2\alpha}$ , corresponding to  $T^{-1/2+\alpha}$ . Therefore, in the interval  $[T^{-1/2+\alpha}, 1]$ , we have

1. Consider term (3):

$$\begin{aligned} \phi\left(\frac{\eta - \mu_0\tau}{\sqrt{\tau}}\right) \frac{1}{\sqrt{\tau}} &\leq \phi\left(\frac{\eta - \mu_0T^{-1/2+\alpha}}{T^{-1/4+\alpha/2}}\right) \frac{1}{T^{-1/4+\alpha/2}} \\ &= \phi\left(\eta T^{1/4-\alpha/2} - \mu_0 T^{-1/4+\alpha/2}\right) \frac{1}{T^{-1/4+\alpha/2}}. \end{aligned}$$

Here, since  $\eta = \frac{2\log(n)}{\sqrt{n}} \leq 2\log(T)T^{-\alpha/2-1/4}$ , the part  $\eta T^{1/4-\alpha/2}$  is bounded by  $2\log(T)$ .

Instead,  $\mu_0 T^{-1/4+\alpha/2} \geq CT^{1/4-\alpha/2}T^{-1/4+\alpha/2} = C$ .

2. Term (4) is non-negative.

Therefore, for  $C = 4\log(T)$ , we have that in the interval  $[T^{-1/2+\alpha}, 1]$

$$(3) + (4) \leq \phi(2\log(T)) \frac{1}{T^{-1/4+\alpha/2}} = \frac{1}{\sqrt{2\pi}T^{-1/4+\alpha/2}} e^{-2\log(T)^2} \leq \frac{T^{-1}}{\sqrt{2\pi}}.$$

With this inequality, we have



$$\begin{aligned}
\mathbb{P}\left(|B_t + t\mu_0 \leq \eta| \leq T^{-1/2+\alpha}\right) &= 1 - 2 \frac{T^{-1}}{\sqrt{2\pi}} \int_{T^{-1/2+\alpha}}^1 \left( \frac{\phi(\mu_0\sqrt{1-\tau})}{\sqrt{1-\tau}} + \mu_0 \Phi(\mu_0\sqrt{1-\tau}) \right) d\tau \\
&\geq 1 - 2 \frac{T^{-1}}{\sqrt{2\pi}} \int_{T^{-1/2+\alpha}}^1 \frac{1}{\sqrt{2\pi(1-\tau)}} + |\mu_0| d\tau \\
&\geq 1 - 2 \frac{T^{-1}}{\sqrt{2\pi}} \int_0^1 \frac{1}{\sqrt{2\pi(1-\tau)}} + |\mu_0| d\tau \\
&= 1 - 2 \frac{T^{-1}}{\sqrt{2\pi}} \left( \frac{\sqrt{2}}{\sqrt{\pi}} + \mu_0 \right).
\end{aligned}$$

At this point, knowing from the assumptions that  $n < T$ , we have  $\mu_0 \leq \sqrt{T}$ , which implies

$$\mathbb{P}\left(|B_t + t\mu_0 \leq \eta| \leq T^{-1/2+\alpha}\right) \geq 1 - \frac{T^{-1/2}}{\pi}.$$

Substituting this result into equation 5, we get, for  $s = T^{-1/2+\alpha}$  and  $n \geq T^{1/2+\alpha}$

$$\begin{aligned}
\mathbb{P}\left(\sum_{i=0}^{n-1} \mathbf{1}_{(-\infty, 0]}(G_i + i\mu) < T^{2\alpha}\right) &\geq 1 - \frac{T^{-1/2}}{\pi} - \frac{\sqrt{2}}{\sqrt{\pi} T^{1/2+\alpha} \log(T^{1/2+\alpha})} \\
&\geq 1 - 2T^{-1/2}.
\end{aligned}$$

□

The second result is the following

**Theorem 13.** *Let  $T$  be a sufficiently large constant. Let  $(G_i)_{i \in \{0, \dots, n-1\}}$  be a Gaussian 0-mean unit variance random walk, and  $\mu \in \mathbb{R}$  such that  $\mu \leq -CT^{-\theta}$ , for some  $\theta \in (0, 1/2)$  and  $C = 2\sqrt{\log(T)} + 2$ . Then, for any  $\alpha \in (0, 1/2)$ , setting  $n = \lfloor T^{1/2+\alpha} \rfloor$  we have*

$$\mathbb{P}\left(\sum_{i=0}^{n-1} \mathbf{1}_{(-\infty, 0]}(G_i + i\mu) \leq T^{2\alpha}\right) \leq 3T^{-1/2+\theta}.$$

*Proof.* In the rest of the proof, we will assume, for ease of notation, that  $T$  is such that  $T^{1/2+\alpha}$  an integer, so that  $n = T^{1/2+\alpha}$ . This is done without loss of generality, since substituting  $n$  with  $n+1$  leads to a negligible difference for  $T$  sufficiently large. Applying the discretization corollary 10, we have that for every  $s \in (0, 1)$

$$\mathbb{P}\left(\sum_{i=0}^{n-1} \mathbf{1}_{(-\infty, 0]}(G_i + i\mu) \leq sn\right) \leq \mathbb{P}\left(\left|B_t + t\mu_0 \leq -\frac{2\log(n)}{\sqrt{n}}\right| \leq s\right) + \frac{\sqrt{2}}{\sqrt{\pi}n \log(n)}, \quad (6)$$

where  $\mu_0 = \sqrt{n}\mu$ . Therefore, by assumption,

$$\mu_0 = \sqrt{n}\mu \leq -(T^{1/2+\alpha})^{1/2}CT^{-\theta} = -CT^{1/4+\alpha/2-\theta}.$$

Differently from the previous proof, here we cannot directly apply theorem 11, since  $\eta = -\frac{2\log(n)}{\sqrt{n}} < 0$ .

Still, we can say that

$$\begin{aligned}
\mathbb{P}\left(\left|B_t + t\mu_0 \leq -\frac{2\log(n)}{\sqrt{n}}\right| \leq s\right) &= \mathbb{P}\left(\left|-B_t - t\mu_0 > \frac{2\log(n)}{\sqrt{n}}\right| \leq s\right) \\
&= \mathbb{P}\left(\left|-B_t - t\mu_0 \leq \frac{2\log(n)}{\sqrt{n}}\right| > 1-s\right).
\end{aligned}$$

At this point, we set  $\eta = \frac{2\log(n)}{\sqrt{n}}$ ,  $\tilde{\mu}_0 = -\mu_0$  and  $B_t = -B_t$  (it is not necessary to rename it since its distribution is symmetric). In this way we can apply theorem 11 having that the previous probability corresponds to

$$\begin{aligned} \mathbb{P}(|B_t + t\tilde{\mu}_0 \leq \eta| > 1 - s) &= 2 \int_{1-s}^1 \left( \underbrace{\frac{\phi(\tilde{\mu}_0\sqrt{1-\tau})}{\sqrt{1-\tau}}}_{(1)} + \underbrace{\tilde{\mu}_0\Phi(\tilde{\mu}_0\sqrt{1-\tau})}_{(2)} \right) \\ &\quad \times \left( \underbrace{\phi\left(\frac{\eta - \tilde{\mu}_0\tau}{\sqrt{\tau}}\right) \frac{1}{\sqrt{\tau}}}_{(3)} - \underbrace{\tilde{\mu}_0 e^{2\mu_0\eta} \Phi\left(\frac{-\eta - \tilde{\mu}_0\tau}{\sqrt{\tau}}\right)}_{(4)} \right) d\tau. \end{aligned}$$

Here, we have to consider that

- $\eta = \frac{2\log(n)}{\sqrt{n}} \leq 2\log(T)T^{-\alpha/2-1/4}$
- $\tilde{\mu}_0 \geq CT^{1/4+\alpha/2-\theta}$ .

Moreover, to have the thesis, we are interested in a value of  $s$  such that  $sn = T^{2\alpha}$ , corresponding to  $T^{-1/2+\alpha}$ .

Here, is is convenient to divide the proof in two cases, depending on the sign of  $1/4 + \alpha/2 - \theta$ .

1. Assume  $(1/4 + \alpha/2 - \theta > 0)$ . Then, considering term (3) we have that for  $\tau \in [1/2, 1]$

$$(3) \leq \phi\left(\frac{\eta - \tilde{\mu}_0\tau}{\sqrt{\tau}}\right) \frac{1}{\sqrt{\tau}} \leq \sqrt{2}\phi\left(\sqrt{2}\eta - \tilde{\mu}_0/\sqrt{2}\right).$$

Moreover, since term (4) is nonnegative we also have

$$(3) + (4) \leq \sqrt{2}\phi\left(\sqrt{2}\eta - \tilde{\mu}_0/\sqrt{2}\right) = \frac{1}{\sqrt{\pi}}e^{-(\sqrt{2}\eta - \tilde{\mu}_0/\sqrt{2})^2/2}.$$

Being  $1/4 + \alpha/2 - \theta > 0$  and  $\eta < 1$ , the exponent is less than  $-(\sqrt{2} - C/\sqrt{2})^2/2$ . This means that for  $C = 2\sqrt{\log(T)} + 2$  the full term is bounded by

$$(3) + (4) \leq \frac{1}{\sqrt{\pi}}e^{-(\sqrt{2}-C/\sqrt{2})^2/2} = \frac{1}{\sqrt{\pi}}e^{-(\sqrt{2\log(T)})^2/2} = \frac{T^{-1}}{\sqrt{\pi}}.$$

Substituting this inequality, we get

$$\begin{aligned} \mathbb{P}(|B_t + t\tilde{\mu}_0 \leq \eta| > 1 - T^{-1/2+\alpha}) &\leq \frac{2T^{-1}}{\sqrt{\pi}} \int_{1-T^{-1/2+\alpha}}^1 \left( \frac{\phi(\tilde{\mu}_0\sqrt{1-\tau})}{\sqrt{1-\tau}} + \tilde{\mu}_0\Phi(\tilde{\mu}_0\sqrt{1-\tau}) \right) d\tau \\ &\leq \frac{2T^{-1}}{\sqrt{\pi}} \int_{1-T^{-1/2+\alpha}}^1 \frac{1}{\sqrt{2\pi(1-\tau)}} + |\tilde{\mu}_0|d\tau \\ &\leq \frac{2T^{-1}}{\sqrt{\pi}} (2 + T^{-1/2+\alpha}\tilde{\mu}_0) \leq \frac{6T^{-1}}{\sqrt{\pi}}. \end{aligned}$$

This quantity is of course less than  $T^{-\theta}$ , since  $\theta \in (0, 1/2)$  by assumption

2. Assume  $(1/4 + \alpha/2 - \theta < 0)$ . In this case, we have, being  $\tilde{\mu}_0 \geq 0$ , the following inequality

$$\mathbb{P}(|B_t + t\tilde{\mu}_0 \leq \eta| > 1 - s) \leq \mathbb{P}(|B_t \leq \eta| > 1 - s).$$

This simplified form leads to

$$\begin{aligned} \mathbb{P}(|B_t + t\tilde{\mu}_0 \leq \eta| > 1 - s) &\leq 2 \int_{1-s}^1 \frac{\phi(0)}{\sqrt{1-\tau}} \phi\left(\frac{\eta}{\sqrt{\tau}}\right) \frac{1}{\sqrt{\tau}} d\tau \\ &\leq 2 \int_{1-s}^1 \frac{\phi(0)}{\sqrt{1-\tau}} \phi(0) \frac{1}{\sqrt{\tau}} d\tau \\ &= \frac{1}{\pi} \int_{1-s}^1 \frac{1}{\sqrt{\tau(1-\tau)}} d\tau. \end{aligned}$$

Since in our case  $s = T^{-1/2+\alpha} < 1/2$ , this can be further simplified as

$$\begin{aligned} \mathbb{P}(|B_t + t\tilde{\mu}_0 \leq \eta| > 1 - s) &\leq \frac{1}{\pi} \int_{1-s}^1 \frac{1}{\sqrt{\tau(1-\tau)}} d\tau \\ &= \frac{2}{\pi} \int_{1-s}^1 \frac{1}{\sqrt{1-\tau}} d\tau \\ &\stackrel{y=1-\tau}{=} \frac{2}{\pi} \int_0^s \frac{1}{\sqrt{y}} dy = \frac{4}{\pi} \sqrt{s}. \end{aligned}$$

This leads to

$$\mathbb{P}(|B_t + t\tilde{\mu}_0 \leq \eta| > 1 - T^{-1/2+\alpha}) \leq \frac{4}{\pi} T^{-1/4+\alpha/2}.$$

By assumption,  $1/4 + \alpha/2 - \theta < 0$  the exponent is  $-1/4 + \alpha/2 < T^{-1/2+\theta}$ . Therefore, we have

$$\mathbb{P}(|B_t + t\tilde{\mu}_0 \leq \eta| > 1 - T^{-1/2+\alpha}) \leq \frac{4}{\pi} T^{-1/2+\theta}.$$

Therefore, we have proved that in both cases

$$\mathbb{P}(|B_t + t\tilde{\mu}_0 \leq \eta| > 1 - s) \leq \frac{4}{\pi} T^{-1/2+\theta}.$$

Therefore, applying equation 6 and substituting the value of  $n$ , we get

$$\mathbb{P}\left(\sum_{i=0}^{n-1} \mathbf{1}_{(-\infty, 0]}(G_i + i\mu) \leq T^{2\alpha}\right) \leq \frac{4}{\pi} T^{-1/2+\theta} + \frac{\sqrt{2}}{\sqrt{\pi} T^{1/2+\alpha} \log(T^{1/2+\alpha})},$$

which in particular implies

$$\mathbb{P}\left(\sum_{i=0}^{n-1} \mathbf{1}_{(-\infty, 0]}(G_i + i\mu) \leq T^{2\alpha}\right) \leq 3T^{-1/2+\theta}.$$

□

### B.2.3 REGRET BOUND

Before the actual proof, we are stating a simple proposition about the structure of the loggrid, which will ease the next computations.

**Proposition 14.** *Let*

$$LG(1/2, 1, T) := \left\{ \lfloor T^{\lambda_j + (1-\lambda_j)/2} \rfloor : \lambda_j = \frac{j}{\lfloor \log(T) \rfloor}, \forall j = 0, \dots, \lfloor \log(T) \rfloor \right\}.$$

*The following identities hold*

1.  $LG(1/2, 1, T)$  can be equivalently defined as

$$LG(1/2, 1, T) := \left\{ \lfloor T^{1/2 + \frac{j}{2\lfloor \log(T) \rfloor}} \rfloor, \forall j = 0, \dots, \lfloor \log(T) \rfloor \right\}.$$

2. Let  $\ell_j$  the  $j$ -th element of  $LG(1/2, 1, T)$ , and  $\alpha_j = \frac{\log(\ell_j)}{\log(T)} - 1/2$ . Then  $\alpha_j = \frac{j}{2\lfloor \log(T) \rfloor} + o(T^{-1/2})$ .
3. The ratio of two consecutive values of  $\ell_j$  is  $\frac{\ell_{j+1}}{\ell_j} \approx T^{\frac{1}{2\lfloor \log(T) \rfloor}} \in [\sqrt{e}, 2]$  for  $T \geq 51$ .

**Theorem 7.** *In the stochastic bandits with ranking feedback setting, Algorithm 2 achieves the following regret bound:*

$$R_T \leq \tilde{O}\left(n\sqrt{T}\right),$$

*when  $n$  arms are available to the learner.*

*Proof.* We start the proof from the simpler case where just two arms are available, arm 1 being the optimal and arm 2 the suboptimal one. Define

$$\Delta = \mu_1 - \mu_2 > 0.$$

Let us call

$$\tilde{\Delta} = \frac{\Delta}{4\log(T) + 2}.$$

At this point, there are two possibilities,

1.  $\tilde{\Delta} \leq T^{-1/2}$ : in this case, the regret cannot be larger than  $(4\log(T) + 2)T^{1/2}$ , therefore the thesis is true.
2.  $\tilde{\Delta} > T^{-1/2}$ : in this case, by assumption, there are two consecutive points  $\ell_{j_*}, \ell_{j_*+1} \in \mathcal{L}$  such that

$$\tilde{\Delta} \in \left( \frac{T^{1/2}}{\ell_{j_*+1}}, \frac{T^{1/2}}{\ell_{j_*}} \right].$$

This is true due to the fact that the sequence  $\ell_j$  spans from  $T^{1/2}$  to  $T$ . By proposition 14, this can be equivalently expressed by saying that

$$\tilde{\Delta} \in \left( T^{-\frac{j_*+1}{2\lfloor \log(T) \rfloor}}, T^{-\frac{j_*}{2\lfloor \log(T) \rfloor}} \right].$$

We consider only the second case, as the first is already proven.

Let us define the two families of events

$$E_i(t) := \text{arm } i \text{ gets discarded at time } t.$$

We are going to prove two inequalities

- Consider the probability of discarding the optimal arm

$$\begin{aligned}\mathbb{P}\left(\bigcup_{t=1}^T E_1(t)\right) &= \mathbb{P}\left(\bigcup_{t/2 \in \mathcal{L}} E_1(t)\right) \\ &\leq \sum_{j=1}^{|\mathcal{L}|} \mathbb{P}(E_1(2\ell_j)).\end{aligned}$$

Here, we have simply applied the fact that by design of the algorithm arms can only be discarded at timesteps  $t$  such that  $t/2 \in \mathcal{L}$  and then the union bound. At this point, we have, by line 9 of the algorithm, the following inclusion between events

$$E_1(2\ell_j) \subset \{1 \notin \mathcal{F}_{2\ell_j}(T^{2\alpha_j})\},$$

where  $\alpha_j = \frac{\log(\ell_j)}{\log(T)} - \frac{1}{2}$ . Here, remember that, by definition of the filtering condition, this event can be again rewritten as

$$\left\{ \sum_{\tau=1:2|\tau}^{2\ell_j} \{\mathcal{R}_{\tau,1} = 1\} < T^{2\alpha_j} \right\} = \left\{ \sum_{\tau=1}^{\ell_j} \{\mathcal{R}_{2\tau,1} = 1\} < T^{2\alpha_j} \right\}.$$

Since before the discarding we always alternate between the two arms, we note that the previous event can be interpreted as the time in which the random walk given by the difference of the rewards of the two arms stays in  $(-\infty, 0]^5$ :

$$\begin{aligned}\sum_{\tau=1}^{\ell_j} \mathbf{1}\{\mathcal{R}_{2\tau,1} = 1\} &= \sum_{\tau=1}^{\ell_j} \mathbf{1}\{\hat{\mu}_{2\tau,1} \geq \hat{\mu}_{2\tau,2}\} \\ &= \sum_{\tau=1}^{\ell_j} \mathbf{1}_{(-\infty, 0]} \left( \underbrace{\sum_{k=1}^{\tau} r_{2,k} - \sum_{j=1}^{\tau} r_{1,k}}_{G_{\tau}} \right)\end{aligned}$$

Where  $\sum_{k=1}^{\tau} r_{2,k}$  is the cumulative reward of arm 2 and  $\sum_{k=1}^{\tau} r_{1,k}$  is the cumulative reward of arm 1. Therefore, we have written this quantity as the time spent by the random walk  $G_{\tau}$  in the interval  $(-\infty, 0]$ , for  $\tau = 1, \dots, \ell_j$ . The drift term for this random walk is given by

$$\mathbb{E}[r_{2,k} - r_{1,k}] = \mu_2 - \mu_1 = -\Delta.$$

Therefore, we can apply theorem 13 for the following choice of parameters

- (a)  $\alpha = \alpha_j = \frac{j}{2\lfloor \log(T) \rfloor} + o(T^{-1/2})$  (proposition 14), which implies  $n = \lfloor T^{1/2+\alpha_j} \rfloor = \ell_j$ .
- (b)  $\theta = \frac{j_{\star}+1}{2\lfloor \log(T) \rfloor}$ . (We can use this choice since the drift is

$$-\Delta = - \underbrace{(4\log(T) + 2)}_{\geq 2\sqrt{\log(T)+2}} \underbrace{\tilde{\Delta}}_{\geq T^{-\frac{j_{\star}+1}{2\lfloor \log(T) \rfloor}}},$$

therefore the assumptions of the theorem are respected.)

Applying the theorem, we have

$$\mathbb{P}(E_1(2\ell_j)) \leq 3T^{-1/2+\theta} = 3T^{-1/2+\frac{j_{\star}+1}{2\lfloor \log(T) \rfloor}}.$$

<sup>5</sup>Technically, in this case should be  $(-\infty, 0)$ , but being the rewards Gaussian, the event two arms have exactly the same cumulative reward is negligible.

Summing over  $j$ , we get

$$\begin{aligned}\mathbb{P}\left(\bigcup_{t=1}^T E_1(t)\right) &\leq \sum_{j=1}^{|\mathcal{L}|} \mathbb{P}(E_1(2\ell_j)) \\ &\leq 3 \log(T) T^{-1/2 + \frac{j_*+1}{2\lceil \log(T) \rceil}}.\end{aligned}$$

- Now, consider the probability that the worst arm gets discarded not after step  $2\ell_{j_*+1}$ , i.e.

$$\mathbb{P}\left(\bigcup_{t=1}^{2\ell_{j_*+1}} E_2(t)\right).$$

Now, let  $\alpha_{j_*+1} = \frac{\log(\ell_{j_*+1})}{\log(T)} - \frac{1}{2}$ . By design of the algorithm, at any time step  $2\ell_j$ , if an arm does not satisfy the filtering condition it gets discarded, if it was active before that moment. Formally,

$$\{2 \notin \mathcal{F}_{2\ell_{j_*+1}}(T^{2\alpha_{j_*+1}})\} \subset \left\{ \bigcup_{t=1}^{2\ell_{j_*+1}} E_2(t) \right\}.$$

As before, the event  $\{2 \notin \mathcal{F}_{2\ell_{j_*+1}}(T^{2\alpha_{j_*+1}})\}$  can be interpreted as the difference between two random walks being negative, due to the fact that

$$\begin{aligned}\sum_{\tau=1}^{\ell_{j_*+1}} \{\mathcal{R}_{2\tau,2} = 1\} &= \sum_{\tau=1}^{\ell_{j_*+1}} \mathbf{1}\{\hat{\mu}_{2\tau,2} \geq \hat{\mu}_{2\tau,1}\} \\ &= \sum_{\tau=1}^{\ell_{j_*+1}} \mathbf{1}_{(-\infty, 0]} \left( \underbrace{\sum_{k=1}^{\tau} r_{1,k} - \sum_{j=1}^{\tau} r_{2,k}}_{G_\tau} \right).\end{aligned}$$

In this formulation, we have written the quantity of interest for the filtering condition at time  $2\ell_{j_*+1}$  as the time spent by the random walk  $G_\tau$  in the interval  $(-\infty, 0]$ , for  $\tau = 1, \dots, \ell_{j_*+1}$ . This time, the drift term is

$$\mathbb{E}[r_{1,k} - r_{2,k}] = \mu_1 - \mu_2 = \Delta.$$

Therefore, we can apply theorem 12 for  $\alpha = \alpha_{j_*}$ , since, by assumption

$$\Delta = \underbrace{(4 \log(T) + 2)}_{\geq 4 \log(T)} \underbrace{\tilde{\Delta}}_{\geq T^{-\frac{j_*+1}{2\lceil \log(T) \rceil}}}.$$

This theorem leads to

$$\begin{aligned}\mathbb{P}\left(\bigcup_{t=1}^{2\ell_{j_*+1}} E_2(t)\right) &\geq \mathbb{P}\left(\sum_{\tau=1}^{\ell_{j_*+1}} \mathbf{1}_{(-\infty, 0]}(G_\tau) \leq T^{2\alpha_{j_*+1}}\right) \\ &\stackrel{thm.12}{\geq} 1 - 2T^{-1/2}.\end{aligned}\tag{7}$$

To conclude, note that we can decompose the regret in the following way:

$$R_T \leq \underbrace{T\Delta\mathbb{P}\left(\bigcup_{t=1}^T E_1(t)\right)}_{R_{T,o}} + \underbrace{\Delta 2\ell_{j_*+1} + \Delta T\left(1 - \mathbb{P}\left(\bigcup_{t=1}^{2\ell_{j_*+1}} E_2(t)\right)\right)}_{R_{T,\rho}},$$

where the first part is associated to the discarding of the optimal arm and the second to the fact that the suboptimal is not discarded fast enough. Precisely, the term  $\Delta 2\ell_{j_*+1}$  corresponds to the regret done in the first  $2\ell_{j_*+1}$  time steps in case no arm is discarded, while  $\Delta T\left(1 - \mathbb{P}\left(\bigcup_{t=1}^{2\ell_{j_*+1}} E_2(t)\right)\right)$  is the regret in case arm 2 is not discarded at step  $2\ell_{j_*+1}$  multiplied by  $\Delta T$ ; being  $T \geq 2\ell_{j_*+1}$ , this quantity is an upper bound for the true regret. We can use the results just found to bound both parts.

- Regret due to discarding the optimal arm:

$$\begin{aligned} R_{T,o} &= T\Delta\mathbb{P}\left(\bigcup_{t=1}^T E_1(t)\right) \\ &\leq T \times T^{-\frac{j_*}{2\lceil\log(T)\rceil}} \mathbb{P}\left(\bigcup_{t=1}^T E_1(t)\right) \\ &\leq T \times (4\log(T) + 2)T^{-\frac{j_*}{2\lceil\log(T)\rceil}} \times 3\log(T)T^{-1/2+\frac{j_*+1}{2\lceil\log(T)\rceil}} \\ &= C_0 T^{1/2} T^{-\frac{j_*}{2\lceil\log(T)\rceil} + \frac{j_*+1}{2\lceil\log(T)\rceil}} \\ &\leq C_0 T^{1/2} T^{\frac{1}{2\lceil\log(T)\rceil}} \\ &= C_0 T^{1/2} e^{\frac{\log(T)}{2\lceil\log(T)\rceil}} \leq C_0 \sqrt{4} T^{1/2} = 2C_0 T^{1/2}. \end{aligned}$$

where  $C_0 := (4\log(T) + 2)3\log(T)$ . In this chain of inequalities we have used the result of the first part of the proof, plus trivial algebraic manipulations.

- Regret due to not discarding the suboptimal arm fast enough

$$R_{T,\rho} = \Delta 2\ell_{j_*+1} + \Delta T\left(1 - \mathbb{P}\left(\bigcup_{t=1}^{2\ell_{j_*+1}} E_2(t)\right)\right)$$

Here, knowing that  $\tilde{\Delta} \in \left(\frac{T^{1/2}}{\ell_{j_*+1}}, \frac{T^{1/2}}{\ell_{j_*}}\right]$ , the first part is bound by

$$2\ell_{j_*+1}(4\log(T) + 2)\frac{T^{1/2}}{\ell_{j_*}} = (8\log(T) + 4)T^{1/2}\frac{\ell_{j_*+1}}{\ell_{j_*}}.$$

where we can use proposition 14 to bound the ratio  $\frac{\ell_{j_*+1}}{\ell_{j_*}}$  with 2, so that this part is bounded by  $(16\log(T) + 8)T^{1/2}$ .

Finally, about the last part we have by equation 7,

$$\Delta T\left(1 - \mathbb{P}\left(\bigcup_{t=1}^{2\ell_{j_*+1}} E_2(t)\right)\right) \leq \Delta T\left(1 - 1 + 2T^{-1/2}\right) \leq T^{1/2}\Delta.$$

Since  $\Delta$  is assumed to be less than one, this part of the regret is bounded by  $T^{1/2}$ .

In the end, summing the two terms  $R_{T,o}, R_{T,\rho}$ , we can obtain the following upper bound on the expected regret:

$$R_T \leq \left((24\log(T) + 12)\log(T) + 16\log(T) + 8 + 1\right)\sqrt{T},$$

which can be also written as

$$R_T \leq (24 \log(T)^2 + 28 \log(T) + 9) \sqrt{T}.$$

which concludes the proof for two arms. This proof can be easily generalized to an arbitrary number of arms by making the following steps:

1. Without loss of generality, we can assume that all arms are ordered, so that  $0 = \Delta_1 < \Delta_2 < \dots < \Delta_n$ .
2. We consider the cases in which for every  $i < n$  it holds  $2\Delta_i \leq \Delta_{i+1}$ . It can be proved that this step is also done without loss of generality, as a general bandit instance can be reduced to an instance of this type by at most doubling the regret.
3. Fix an arm  $i$  with corresponding gap  $\Delta > T^{-1/2}$  (arms with smaller  $\Delta$  cannot contribute significantly to the regret). Similarly to Theorem 6, denote with  $j_\star \in \{0, \dots, \lceil \log(T) \rceil\}$  the integer such that  $\Delta \in \left( T^{-\frac{j_\star+1}{2\lceil \log(T) \rceil}}, T^{-\frac{j_\star}{2\lceil \log(T) \rceil}} \right]$ .
4. With the same computation of Theorem 6, it is possible to prove that the probability of  $i$  eliminating an arm with lower index is bounded by  $\tilde{O}\left(T^{-1/2 + \frac{j_\star+1}{2\lceil \log(T) \rceil}}\right)$ . In the same way it is proved that the probability of arm  $i$  to survive more than  $\lfloor T^{1/2 + \frac{j}{2\lceil \log(T) \rceil}} \rfloor$  rounds when an arm with lower index is active is bounded by  $2T^{-1/2}$ .
5. From point 4, the expected number  $\mathbb{E}[Z_i(T)]$  of pulls of arm  $i$  is bounded by

$$(2T^{-1/2} + T^{-1/2 + \frac{j_\star+1}{2\lceil \log(T) \rceil}})T + \lfloor T^{1/2 + \frac{j}{2\lceil \log(T) \rceil}} \rfloor = \tilde{O}(T^{1/2 + \frac{j_\star+1}{2\lceil \log(T) \rceil}}),$$

which makes  $\Delta \mathbb{E}[Z_i(T)] = \tilde{O}(T^{1/2})$ . By multiplying this by the number of arms ( $n$ ), we obtain the desired result. □

## C PROOF FOR ADVERSARIAL SETTING

**Theorem 8.** *In adversarial bandits with ranking feedback, no algorithm achieves  $o(T)$  regret with respect to the best arm in hindsight with a probability of  $1 - \epsilon$  for any  $\epsilon > 0$ .*

*Proof.* This negative result follows from the impossibility to achieve  $R_T \leq CT$  regret by any algorithm, with  $C$  properly set constant and probability  $1 - \bar{\epsilon}$ , in all three instances reported next. Please notice that, this result implies that even the No-Regret property cannot be achieved in the Bandit with Ranking Feedback setting.

Without loss of generality we consider rewards function bounded in  $[0, 10]$ . Consider three instances, with two arms  $a_0, a_1$  for each and the associated rewards, defined as follows:

$$\begin{aligned} \text{Instance ① : } & \begin{cases} a_0 : \frac{1}{2} & \forall t \in \boxed{1}, & \frac{1}{2} & \forall t \in \boxed{2}, & \frac{1}{2} & \forall t \in \boxed{3} \\ a_1 : 0 & \forall t \in \boxed{1}, & 0 & \forall t \in \boxed{2}, & 0 & \forall t \in \boxed{3} \end{cases} \\ \text{Instance ② : } & \begin{cases} a_0 : \delta & \forall t \in \boxed{1}, & 0 & \forall t \in \boxed{2}, & 0 & \forall t \in \boxed{3} \\ a_1 : 0 & \forall t \in \boxed{1}, & 1 & \forall t \in \boxed{2}, & 1 & \forall t \in \boxed{3} \end{cases} \\ \text{Instance ③ : } & \begin{cases} a_0 : \delta & \forall t \in \boxed{1}, & 0 & \forall t \in \boxed{2}, & 10 & \forall t \in \boxed{3} \\ a_1 : 0 & \forall t \in \boxed{1}, & 1 & \forall t \in \boxed{2}, & 0 & \forall t \in \boxed{3} \end{cases} \end{aligned}$$



where Phase  $\boxed{1}$  is made by the first  $T/4$  rounds, Phase  $\boxed{2}$  is made by the next  $T/4$  rounds, Phase  $\boxed{3}$  is made by the last  $T/2$  rounds and  $\delta$  is near to 0.

In phase  $\boxed{1}$  all the instances have the same ranking feedback, as the first action gives higher rewards with respect to the second one. To make instance  $\textcircled{1}$  receive  $R_T \leq CT$ , it is necessary:

$$\frac{1}{2}T - \frac{1}{2}\mathbb{E}[n_{a_0}] \leq CT \Rightarrow \mathbb{E}[n_{a_0}] \geq (1 - 2C)T \quad (8)$$

where  $n_{a_0}$  is the number of times the first arm has been pulled, and the expected value is taken on the randomization of the algorithm. From previous equation we obtain that in all instances:

$$\mathbb{E}\left[n_{a_0}^{\boxed{1}}\right] \geq (1 - 2C)T - \frac{3}{4}T = (1 - C_1)T/4 \quad (9)$$

where  $C_1 = 8C$ ,  $n_{a_0}$  is the number of time the first arm has to be pulled in phase  $\boxed{1}$  and the inequality is computed considering that  $a_0$  is played in all the next phases.

By reverse Markov inequality:

$$\mathbb{P}\left(n_{a_0}^{\boxed{1}} > (1 - \bar{C}_1)T/4\right) \geq \frac{\bar{C}_1 - C_1}{C_1} \quad (10)$$

Setting the probability equal to 9/10 we obtain:

$$\bar{C}_1 = 10C_1 \quad (11)$$

from which follow that with probability 9/10 we have:

$$n_{a_0}^{\boxed{1}} > (1 - 10C_1)T/4 \quad (12)$$

and consequently:

$$n_{a_1}^{\boxed{1}} \leq 10C_1T/4. \quad (13)$$

We observe that in the second Phase, Instances  $\textcircled{2}$  and  $\textcircled{3}$  have the same feedback. Proceeding as done before, to make instance  $\textcircled{2}$  receive  $R_T \leq CT$  it is necessary:

$$\frac{3}{4}T - \mathbb{E}[n_{a_1}] \leq CT \Rightarrow \mathbb{E}[n_{a_1}] \geq \left(\frac{3}{4} - C\right)T \quad (14)$$

From previous equation we obtain that in instances  $\textcircled{2}$  and  $\textcircled{3}$ :

$$\mathbb{E}\left[n_{a_1}^{\boxed{2}}\right] \geq \left(\frac{3}{4} - C\right)T - T/2 = (1 - C_2)T/4 \quad (15)$$

where the inequality is computed considering that  $a_1$  is played in the next phases and  $C_2 = 4C$ . By Reverse Markov Inequality, we obtain that, with probability 9/10:

$$n_{a_1}^{\boxed{2}} > (1 - 10C_2)T/4 \quad (16)$$

and consequently:

$$n_{a_0}^{\boxed{2}} \leq 10C_2T/4 \quad (17)$$

We neglect the  $\delta$  value for now, as it can be chosen to be insignificant with respect to the previous computation.

Now we focus on the third phase, in which instance  $\textcircled{2}$  should play:

$$\mathbb{E}\left[n_{a_1}^{\boxed{3}}\right] \geq \left(\frac{3}{4} - C\right)T - T/4 = (1 - C_3)T/2, \quad (18)$$

where  $C_3 = 2C$ . By Reverse Markov Inequality, we obtain that, with probability 9/10:

$$n_{a_1}^{\boxed{3}} > (1 - 10C_3)T/2 \quad (19)$$

and consequently:

$$n_{a_0}^{[3]} \leq 10C_3T/2 \quad (20)$$

Now, we compute the number of rounds needed in the third instance to switch the ranking in the third phase, namely  $q$ . Notice that, until this switch, the last two instances receive the same feedback.

We compute  $q$  in the best-case scenario (that is, when small  $q$  value is sufficient to allow the switch) that satisfies the constraints previously shown. Precisely,  $q$  is computed so that the empirical mean of

arm  $a_0$  is greater than the arm  $a_1$  one, given that  $n_{a_0}^{[1]} > (1 - 10C_1)T/4$  and  $n_{a_1}^{[2]} > (1 - 10C_2)T/4$ . Formally:

$$\frac{0(1 - 10C_1)T/4 + 10q}{q + (1 - 10C_1)T/4} \geq \frac{0C_110T/4 + (1 - 10C_2)T/4 + 0T/2}{10C_1T/4 + (1 - 10C_2)T/4 + T/2} \quad (21)$$

We now show that for proper  $C$  value we can lower bound the right side with  $\frac{1}{4}$ . In particular:

$$\frac{0C_110T/4 + (1 - 10C_2)T/4 + 0T/2}{10C_1T/4 + (1 - 10C_2)T/4 + T/2} > \frac{1}{4} \Rightarrow C < 1/200 \quad (22)$$

which means that, for  $C < \frac{1}{200}$ , we can substitute the right side of the equation with  $\frac{1}{4}$  to simplify the computation. Moreover, notice that gap between  $\frac{1}{4}$  and  $\frac{0C_110T/4 + (1 - 10C_2)T/4 + 0T/2}{10C_1T/4 + (1 - 10C_2)T/4 + T/2}$  allowed us to neglect the computations with  $\delta$ . Then:

$$\frac{0(1 - 10C_1)T/4 + 10q}{q + (1 - 10C_1)T/4} \geq 1/4 \Rightarrow q \geq \frac{4}{39} \left( \frac{1}{4} - 20C \right) T/4 \quad (23)$$

To achieve a contradiction, it sufficient to find  $C$  so that  $q + n_{a_1}^{[3]} > T/2$ ; indeed, the previous inequality shows the impossibility to gain enough rewards to make the ranking change and, at the same time, guarantee the minimum rewards to make instance ② No-Regret. Given that the ranking switch is a necessary condition to make instance ③ No-Regret, the result of impossibility follows for:

$$\frac{4}{39} \left( \frac{1}{4} - 20C \right) T/4 + (1 - 20C)T/2 > T/2 \Rightarrow C < \frac{1}{1640} \quad (24)$$

To conclude the proof, we show that the intersection between the events derived by Reverse Markov Inequality (namely  $E_i$  with  $i \in [3]$ ) holds with constant probability:

$$\begin{aligned} \mathbb{P} \left( \bigcap_{i \in [3]} E_i \right) &= 1 - \mathbb{P} \left( \bigcup_{i \in [3]} E_i^c \right) \\ &\geq 1 - \sum_{i \in [3]} \mathbb{P}(E_i^c) \\ &= 1 - \frac{3}{10} = \frac{7}{10} \end{aligned}$$

where the inequality holds by Union Bound. Substituting all the previous results in the definition of Regret we obtain, with probability  $\frac{7}{10} = 1 - \bar{\epsilon}$  and  $C < \frac{1}{1640}$ ,  $R_T \geq CT = \Omega(T)$  which concludes the proof.  $\square$

## D EXPERIMENTS

For the sake of clarity, we report in the followings additional details on the four instances presented in Figures 1,2:

- *Instance of Figure 1a*: time horizon  $T = 2 \cdot 10^5$ , arms  $n = 4$ , mean reward vector

$$\boldsymbol{\mu} = [0.9, 1.05, 1.12, 1.15],$$

unitary variance for each arm,  $\Delta_{\min} = 0.03$ ;

- *Instance of Figure 1b*: time horizon  $T = 2 \cdot 10^5$ , arms  $n = 6$ , mean reward vector

$$\boldsymbol{\mu} = [0.03, 0.07, 0.1, 0.08, 0.97, 1],$$

unitary variance for each arm,  $\Delta_{\min} = 0.03$ ;

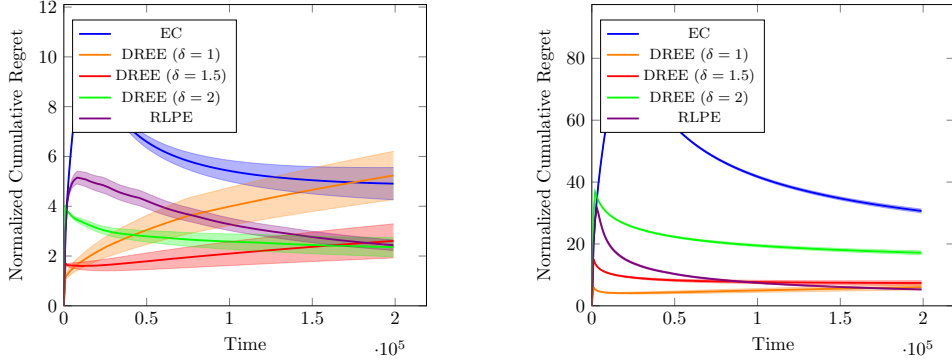

(a) Instance with  $\Delta_{\min} = 0.03$  and all the gaps small (b) Instance with  $\Delta_{\min} = 0.03$  and the other gaps big

Figure 3: Normalized cumulative regret for  $\Delta_{\min} < 0.05$  (averaged over 50 runs; 95% confidence interval).

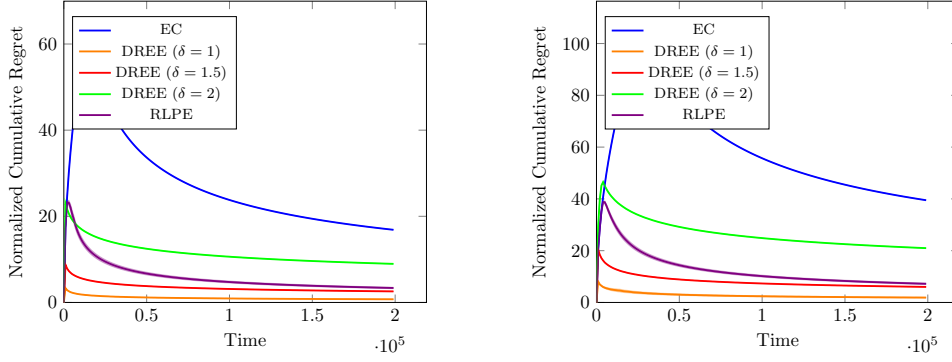

(a) Instance with  $\Delta_{\min} = 0.5$

(b) Instance with  $\Delta_{\min} = 0.25$

Figure 4: Normalized cumulative regret for  $\Delta_{\min} \geq 0.25$  (averaged over 50 runs; 95% confidence interval).

- Instance of Figure 2a: time horizon  $T = 2 \cdot 10^5$ , arms  $n = 4$ , mean reward vector

$$\boldsymbol{\mu} = [0.05, 0.25, 0.5, 1.0],$$

unitary variance for each arm,  $\Delta_{\min} = 0.5$ ;

- Instance of Figure 2b: time horizon  $T = 2 \cdot 10^5$ , arms  $n = 8$ , mean reward vector

$$\boldsymbol{\mu} = [0.05, 0.05, 0.1, 0.15, 0.25, 0.5, 0.75, 1.0],$$

unitary variance for each arm,  $\Delta_{\min} = 0.25$ ;

#### D.1 NORMALIZED REGRET

In the following, we propose additional plots related to the four instances previously described. In particular, we plot the normalized cumulative regret, computed as  $R_t/\sqrt{t}$ ,  $\forall t \in [T]$ . This empirical evaluation shows that, empirically, R-LPE attains a regret bound of order  $\tilde{O}(\sqrt{T})$ .

#### D.2 DETAILED EXPLANATION OF THE EXPERIMENTS

In this section, we report all the details of the experiments performed in the paper. These are important to ensure the truthfulness of the results and the claims based on empirical validation.

**Training Details** In the main paper we have presented four experiments, each corresponding to a different environment. Each experiment is performed for fifty random seeds, and the computation is split in 10 parallel processes by the library `joblib`. The overall computational time for one experiment is around 337.92 seconds, that is roughly five minutes and one half.

**Compute** As stated, the numerical simulations resulted to be very fast. For this reason, it was not necessary to run them on a server, and we used a personal computer with the following specifications:

- CPU: 11th Gen Intel(R) Core(TM) i7-1165G7 2.80 GHz
- RAM: 16,0 GB
- Operating system: Windows 11
- System type: 64 bit

**Reproducibility** Due to the stochastic nature of the bandit problem, all the simulations have been repeated several times. We have performed all the experiments with 50 different random seeds, corresponding precisely to the first 50 natural numbers. The seed influences the generation of the reward by the environment, while all algorithms proposed, being deterministic, are independent on the seed.
